# Supplementary material
Source: publisher site journal article supplement (https://www.degruyterbrill.com/publication/isbn/9783110555578/downloadAsset/9783110555578__5Anhang.pdf)
Supplement: Supplementary file 1 [file 9783110555578__5Anhang.pdf]

# Anhang

## ANHANG 1–1: Schulbuchforschung zur Geschlechterthematik (1967–2015)

Die Bibliographie *Schulbuchforschung zur Geschlechterthematik* ist nach den Erscheinungsjahren der Titel in Dekaden untergliedert. Im Schwerpunkt handelt es sich um Forschung zu deutschen Schulbüchern, zum Teil auch zu österreichischen und schweizerischen. Die Liste enthält außerdem thematisch einschlägige Forschung zu Grammatiken und Wörterbüchern des Deutschen. Die für die vorliegende Untersuchung ausgewertete Literatur der Bibliographie ist in der Liste kursiv gesetzt.

### 1960er Jahre

1. Schlette, Hanna/Pfülb, Mechthild (1967): *Das Bild des Mädchens und der Frau in Lesebüchern in Realschulen*. In: *Informationen für die Frau* 11/12, S. 12–14.
2. Sollwedel, Inge (1967): *Das Bild des Mädchens und der Frau in Lesebüchern für Volksschulen*. In: *Informationen für die Frau* 11/12, S. 10–12.
3. Sollwedel, Inge (1968): Politische Mädchenerziehung im Lesebuch. In: *Gesellschaft – Staat – Erziehung* 13(2), S. 86–88.
4. Sollwedel, Inge (1968): Das Mädchen- und Frauenbild in den Lesebüchern der Volksschule. Ergebnisse einer Untersuchung in Baden-Württemberg. In: *Informationen für die Frau* 3, S. 12–14.
5. Leibbrand, Frieda/Robisch, Udelgard (1969): Das Bild der Frau in Lesebüchern der Grundschule. In: *Die Schulfarte* 22(1), S. 91–97.

### 1970er Jahre

6. Roehler, Klaus (1970): *Die Abrichtung. Deutsche Sätze für Schüler und Erwachsene*. In: *Ide, Heinz/Berg, Martin (Hrsg.): Bestandsaufnahme Deutschunterricht. Ein Fach in der Krise*. Stuttgart, S. 93–106.
7. Sollwedel, Inge (1970): Das neue Frauenbild in den Lesebüchern. Untersuchung der derzeitigen Lesebücher für den Deutschunterricht in Grund-, Haupt- und Volksschulen Hessens. In: *Informationen für die Frau* 6, S. 6–8.
8. Beilfuß, Dorothea/Preuss-Lausitz, Ulf (1971): Zauberin und Arbeitstier. Die Frau im Lesebuch. In: *Blätter für deutsche und internationale Politik* 10, S. 1069–1082.
9. Helwig, Gisela (1971): Die Darstellung der Frau im Lesebuch. In: *Deutschland Archiv – Zeitschrift für Fragen der DDR und der Deutschlandpolitik* 4(1), S. 68–69.
10. Krüger, Udo Michael (1971): Das Fremdbild des Mädchens und der Frau in Schullesebüchern der BRD. In: *Informationen für die Frau* 3, S. 11–17.
11. Silbermann, Alphons/Krüger, Udo Michael (1971): *Abseits der Wirklichkeit. Das Frauenbild in deutschen Lesebüchern. Eine soziologische Untersuchung*. Köln.
12. Sollwedel, Inge (1971): *Patriarchat oder kritische Frauenbilder. Zum Leitbild westdeutscher Lesebücher*. In: *Gmelin, Otto/Saussure, Helene (Hrsg.): Bankrott der Männerherrschaft: Material zu Problemen der Frauenemanzipation*. Frankfurt a. M., S. 92–134.

13. Chougrani, Vera Sybille/Kopper, Helmut/Schweisthal, Ulrike/Wichmann, Gabriele (1972): Das Kind im Lesebuch der Grundschule. In: Braun, Peter (Hrsg.): Neue Lesebücher – Analyse und Kritik. Düsseldorf, S. 60–82.
14. Elbracht, Marga/Mosler, Inge (1972): Femina non est homo? Zum Frauenbild in Grund- und Hauptschullesebüchern. In: Braun, Peter (Hrsg.): Neue Lesebücher – Analyse und Kritik. Düsseldorf, S. 82–96.
15. Geiss, Manfred (1972): Die Konservierung sozialer Rollen. Eine Analyse von Verhaltensmustern in Schulfibeln. In: Doderer, Klaus/Aley, Peter/Geiss, Manfred (Hrsg.): Bilderbuch und Fibel: Eine kritische Analyse der Literatur für Leseanfänger. Weinheim/Basel, S. 9–95.
16. Richter, Annegret (1972): Die asexuelle Welt der Lesebücher. In: Sexualpädagogik 4(2), S. 69–76.
17. Grauel, Gabriele (1973): Rollenbilder in Fibeln. In: Beck, Gertrud/Hilligen, Wolfgang (Hrsg.): Politische Bildung ohne Fundament. Untersuchungen zu Richtlinien, Fibeln, Lehrerhandbüchern für den Unterricht in der Grundschule. Neuwied am Rhein, S. 109–147.
18. Henke, Jutte/Arbeitskreis Emanzipation Moers (1973): Die Darstellung der Frau in Schullesebüchern. In: Neue Deutsche Schule 9, S. 262–264.
19. Hinkel, Hermann (1973): „Liebe Mutter, 's wird finster. Zünd's Lämplein an“ – Stereotypen in Schulbüchern, Bilder- und Jugendbüchern und Comics. In: Ehmer, Hermann K. (Hrsg.): Kunst/Visuelle Kommunikation. Unterrichtsmodelle. Gießen, S. 31–43.
20. Internationales Schulbuchinstitut Braunschweig (1973): Darstellung der Frau in den Schulbüchern. Kurzbericht über die Tagung 1972 und Empfehlungen. In: Informationen für die Frau 1, S. 4–5.
21. Merkelbach, Valentin (1973): Lerninhalte in neueren Fibeln. In: Diskussion Deutsch 12, S. 103–123.
22. Römer, Ruth (1973): *Grammatiken, fast lustig zu lesen*. In: *Linguistische Berichte* 28, S. 71–79.
23. Speth, Silke (1973): Das Bild von Familie und Gesellschaft in den Sachaufgaben ausgewählter Rechenbücher der Volksschule. Essen.
24. Glötzner, Johannes (1974): *Die Rolle der Frau in Mathematikbüchern*. In: *Vorgänge – Zeitschrift für Bürgerrechte und Gesellschaftspolitik* 8, S. 109–112.
25. Borries, Bodo von (1975): Frauen in Schulgeschichtsbüchern. Zum Problem der Benachteiligung von Mädchen im Unterricht. In: Westermanns Pädagogische Beiträge 27(11), S. 585–618.
26. Ehelebe, Sigrid/Gajda, Rosemarie (1975): Das Bild der Familie in Lesebüchern für die Primarstufe. In: Menzel, Wolfgang (Hrsg.): Fibeln und Lesebücher für die Primarstufe. Kritische Analysen. Paderborn, S. 119–154.
27. Bittmann, Friedrich (1977): Empirische Untersuchungen zum geschlechtsrollenspezifischen Verhalten in deutschen Lesebüchern. Analyse von Lesebuchgeschichten in Lesebüchern für das 7. Schuljahr. In: Psychologie in Erziehung und Unterricht 24(6), S. 365–369.
28. Rauch, Renate (1977): Bollwerk des Patriarchats. Klischees in Schulbüchern. In: Betrifft: Erziehung, S. 70–74.
29. Tornieporth, Gerda (1977): *Studien zur Frauenbildung. Ein Beitrag zur historischen Analyse lebensweltorientierter Bildungskonzeptionen*. Weinheim.
30. Bittmann, Friedrich (1978): Geschlechtsrollenspezifisches Verhalten in den Geschichten deutscher Lesebücher. Inhaltsanalyse von Lesebuchgeschichten in Lesebüchern für das 4. und 7. Schuljahr. In: Psychologie in Erziehung und Unterricht 25(5), S. 261–271.

31. Borries, Bodo von (1978): Männergeschichte für Mädchenhirne? In: Schallenger, Horst E./Stein, Gerd (Hrsg.): Das Schulbuch – zwischen staatlichem Zugriff und gesellschaftlichen Forderungen. Kastellaun, S. 187–222.
32. Karsten, Gaby (1978): *Mariechens Weg ins Glück? Die Diskriminierung von Mädchen in Grundschullesebüchern*. Berlin.
33. Macholdt, Hedda (1978): Kritische Bestandsaufnahme der Untersuchungen zum Bild der Frau in deutschen Schullesebüchern. In: Oberfeldt, Charlotte/Kauffmann, Heiko/Becker, Jörg (Hrsg.): Zwischen Utopie und heiler Welt. Zur Realismusdebatte in Kinder- und Jugendmedien. Frankfurt a. M., o. S.
34. Mreschar, Renate I. (1978): Auch Frauen machen Geschichte. Schulbücher verschweigen weibliches Wirken. In: Erziehung und Wissenschaft 5, S. 16–17.
35. Nave-Herz, Rosemarie (1978): Das Angebot weiblicher Identifikationsmodelle in Lesebüchern. Eine quantitative und qualitative Inhaltsanalyse. In: Materialien zur Politischen Bildung 4, S. 93–99.
36. Ott-Eckrich, Elvira (1978): Zur Rolle der Frau im Lehrbuch „Etudes françaises“. In: Freudenstein, Reinhold (Hrsg.): The Role of Women in Foreign-Language Textbooks: A Collection of Essays. Bruxelles, S. 93–117.
37. Wagner, C. Angelika/Frasch, Heidi/Lamberti, Elke (1978): *Mann – Frau. Rollenklischees im Unterricht. Unterrichtsmaterialien und Analyse der Geschlechterrollen*. München.
38. Decke, Judith (1979): Das Bild der Frau in Lehrbuchtexten des Französischunterrichts. In: Praxis des neusprachlichen Unterrichts 26, S. 88–90.

## 1980er Jahre

39. Hellinger, Marlis (1980): „For men must work, and women must weep“. Sexism in English language textbooks used in German schools. In: *Women's studies international quarterly* 3, S. 267–275.
40. Henke, Jürgen (1980): Aspekte des heimlichen Lehrplans in Schulbüchern. Eine deskriptive Gruppenanalyse von Sachbüchern der Grundschule unter dem Gesichtspunkt soziosexuellen Lernens. Frankfurt a. M.
41. Kuhn, Annette (1980): *Frauengeschichte und die geschlechtsspezifische Identitätsbildung von Mädchen. Ansätze zu einem frauengeschichtlichen Curriculum*. In: Kuhn, Annette/Tornieporth, Gerda (Hrsg.): *Frauenbildung und Geschlechtsrolle. Historische und erziehungswissenschaftliche Studien zum Wandel der Frauenrolle in Familie und Gesellschaft*. Gelnhausen/Berlin/Stein, S. 69–143.
42. Scharffenorth, Gerta (1980): *Bildung für die Lebenswelt*. In: Kuhn, Annette/Tornieporth, Gerda (Hrsg.): *Frauenbildung und Geschlechtsrolle. Historische und erziehungswissenschaftliche Studien zum Wandel der Frauenrolle in Familie und Gesellschaft*. Gelnhausen/Berlin/Stein, S. 6–14.
43. Streithofen, Heinrich Basilius (1980): Die Familie im Schulbuch. Eine Untersuchung im Auftrag der Katholischen Elternschaft Deutschland und des Familienbundes der Deutschen Katholiken. Walberberg.
44. Tornieporth, Gerda (1980): *Rollenklischees in der Schulausbildung. Beispiel Arbeitslehre*. In: Kuhn, Annette/Tornieporth, Gerda (Hrsg.): *Frauenbildung und Geschlechtsrolle. Historische und erziehungswissenschaftliche Studien zum Wandel der Frauenrolle in Familie und Gesellschaft*. Gelnhausen/Berlin/Stein, S. 15–68.

45. Pronay, Inge (1981): Denk- und Merkwürdigkeiten zum Bild der Frau in österreichischen Schulbüchern. In: Autorinnengruppe Uni Wien (Hrsg.): Das ewige Klischee. Zum Rollenbild und Selbstverständnis bei Männern und Frauen. Wien, S. 276–304.
46. Rohrbeck, Evelyn (1981): Personen/Personengruppen in Sachrechenaufgaben. In: Sachunterricht und Mathematik in der Primarstufe 9(11), S. 445–448.
47. Rüttgens, Hannelore (1981): Textinhalte und Rollenstrukturen: Das Bild der Frau im „Cours de Base“. In: Französische Heute 1, S. 29–38.
48. Barz, Monika (1982): Gleiche Chancen in Lesebüchern der Grundschule? In: Brehmer, Ilse (Hrsg.): Sexismus in der Schule. Der heimliche Lehrplan der Frauendiskriminierung. Weinheim/Basel, S. 103–114.
49. Borries, Bodo von (1982): Weibliche Geschichtslosigkeit: „Angeboren“ oder „erlernt“? In: Brehmer, Ilse (Hrsg.): Sexismus in der Schule. Der heimliche Lehrplan der Frauendiskriminierung. Weinheim/Basel, S. 119–128.
50. Briegel, Ernestine (1982): Das Bild der Frau in ausgewählten Schulbüchern der Bundesrepublik Deutschland und der Deutschen Demokratischen Republik. Eine vergleichende, geschlechtsrollenspezifische Analyse. Augsburg.
51. Geisler, G./Scharnhorst, Erna (1982): Zur Widerspiegelung der gesellschaftlichen Stellung der Frau in den Lesebüchern der Klassen 1 bis 4 in der DDR. In: Informationen des wissenschaftlichen Rats „Die Frau in der sozialistischen Gesellschaft“ 4, S. 60–72.
52. Glötzner, Johannes (1982): Heidi häkelt Quadrate, Thomas erklärt die Multiplikation. Rollenklischees in neuen Mathematikbüchern. In: Brehmer, Ilse (Hrsg.): Sexismus in der Schule. Der heimliche Lehrplan der Frauendiskriminierung. Weinheim/Basel, S. 154–158.
53. Hopfgartner, Peter (1982): Die Darstellung der Arbeits- und Berufswelt in den Lesebüchern der Hauptschule. Innsbruck.
54. Schaeffer-Hegel, Barbara (1982): Der lange Marsch der Samenzellen. Sexismus in schulischer Aufklärungsliteratur. In: Ästhetik & Kommunikation 47, S. 95–107.
55. Zumbühl, Ursula (1982): Learning English and Sexism. In: Brehmer, Ilse (Hrsg.): Sexismus in der Schule. Der heimliche Lehrplan der Frauendiskriminierung. Weinheim/Basel, S. 94–102.
56. Haak, Ulla-Maija/Schröder, Doris (1983): Die Rolle der Frau in Schulbüchern der Sekundarstufe I. Dargestellt an ausgewählten Beispielen im Lande Bremen eingeführter Bücher des Fachbereichs Arbeit-Technik-Wirtschaft. Modellversuch zur Berufsausbildung von Mädchen in gewerblich-technischen Berufen in Bremen. o. O.
57. Heller, Katharina (1983): Zur Darstellung von Personen und Lebensbereichen in ausgewählten Mathematikbüchern für die Sekundarstufe I. In: mathematica didactica 6(6), S. 209–232.
58. Pusch, Luise F. (1983): „Sie sah zu ihm auf wie zu einem Gott“. Das DUDEN-Bedeutungswörterbuch als Trivialroman. In: Pusch, Luise F. (Hrsg.) (1984): Das Deutsche als Männersprache. Frankfurt a. M., S. 135–144.
59. Thomas, Sabine (1983): Mann-Frau-Stereotype in Lesebüchern 1933–1945. Hausarbeit zur Erlangung des Magistergrades. Göttingen.
60. Weiss, Wolfgang (1983): Das Bild der Familie in deutschen Schulbüchern. In: Zeitschrift für Pädagogik 29(5), S. 783–799.
61. Demes, Brigitte (1984): Geschlechtsrollendarstellung in Biologieschulbüchern der Sekundarstufen I und II. In: Brehmer, Ilse/Enders-Dragässer, Uta (Hrsg.): Die Schule lebt. Frauen bewegen die Schule. Dokumentation der 1. Fachtagung in Gießen 1982 und der 2. Fachtagung in Bielefeld 1983 der AG Frauen und Schule. München, S. 213–224.



62. *Kommission für Frauenfragen beim Sozialminister des Landes Schleswig-Holstein (Hrsg.) (1984): Das Frauenbild in Schulbüchern. Bericht der Frauenkommission über die Darstellung der Frau in Schulbüchern, die in Schleswig-Holstein benutzt werden. Kiel.*
63. *Lengerke, Christiane von/Nohr, Karin/Sattler, Ariane/Schuntermann, Dorothee (1984): Kriterienkatalog für die Vermeidung von Sexismus in Schulbüchern. In: Brehmer, Ilse/Enders-Dragässer, Uta (Hrsg.): Die Schule lebt. Frauen bewegen die Schule. Dokumentation der 1. Fachtagung in Gießen 1982 und der 2. Fachtagung in Bielefeld 1983 der AG Frauen und Schule. München, S. 258–263.*
64. *Meyer, Beate/Jordan, Ernst (1984): Gutachten über die Darstellung von Mädchen und Frauen in Hamburger Schulbüchern. Im Auftrag der Leitstelle Gleichstellung der Frau Hamburg. Hamburg.*
65. *Müller, Pia (1984): Das Frauen- und Mädchenbild im Sachunterricht für die Grundschule. Untersuchung der in der Stadtgemeinde Bremen eingeführten Lernbücher für die Jahrgangsklassen 1–4. In: Bremische Zentralstelle für die Verwirklichung der Gleichberechtigung der Frau (Hrsg.): Und drinnen waltet die züchtige Hausfrau. Rollenklischees in Bremischen Grundschulbüchern. Bremen, S. 1–60.*
66. *Nolte, Antonius (1984): Die Rolle von Mann und Frau in Textaufgaben von Mathematik-Schulbüchern. In: mathematica didactica 7(2), S. 101–110.*
67. *Ohlms, Ulla (1984): „Und drinnen waltet die züchtige Hausfrau ...“ – Rollenklischees in Schulbüchern. In: Brehmer, Ilse/Enders-Dragässer, Uta (Hrsg.): Die Schule lebt. Frauen bewegen die Schule. Dokumentation der 1. Fachtagung in Gießen 1982 und der 2. Fachtagung in Bielefeld 1983 der AG Frauen und Schule. München, S. 131–161.*
68. *Schaeffer-Hegel, Barbara (1984): Immer wieder ‚miese‘ Rolle! Kritik an Unterrichtsmaterialien zum Thema ‚Frau‘ und wie es anders gemacht werden könnte. In: Brehmer, Ilse/Enders-Dragässer, Uta (Hrsg.): Die Schule lebt. Frauen bewegen die Schule. Dokumentation der 1. Fachtagung in Gießen 1982 und der 2. Fachtagung in Bielefeld 1983 der AG Frauen und Schule. München, S. 126–130.*
69. *Verleger, Irmgard (1984): Rollenklischees in den Mathematik-Lernbüchern für die Grundschule. Untersuchung der in der Stadtgemeinde Bremen eingeführten Lernbücher für die Jahrgangsklassen 1–4. In: Bremische Zentralstelle für die Verwirklichung der Gleichberechtigung der Frau (Hrsg.): Und drinnen waltet die züchtige Hausfrau. Rollenklischees in Bremischen Grundschulbüchern. Bremen, S. 61–106.*
70. *Vogt, Heide (1984): Die Darstellung von Mädchen und Frauen in Hamburger Schulbüchern, auf der Grundlage eines Gutachtens von Beate Meyer und Ernst Jordan. Hrsg. von der Leitstelle Gleichstellung der Frau. Hamburg.*
71. *Asheuer, Ursula u. a. (1984/85): Unbemerkte Ungleichheit. Die Darstellung von Mädchen und Frauen in 55 für die Berliner Grundschule zugelassenen Schulbüchern – Besonderer Teil (Einzelanalysen). Pädagogisches Zentrum. Berlin.*
72. *Voigt, Erwin (1984/85): Unbemerkte Ungleichheit. Die Darstellung von Mädchen und Frauen in 55 für die Berliner Grundschule zugelassenen Schulbüchern – Allgemeiner Teil und Zusammenfassung. Pädagogisches Zentrum. Berlin.*
73. *Fichera, Ulrike/Osterseizer, Christiane/Schmidt, Karla (1985): Sexismen in Schulbüchern. In: Appel, Christa u. a. (Hrsg.): „Frauenforschung sichtbar machen“: Dokumentation zur Frauenwoche des Arbeitskreises Frauenstudien vom 21.–25. Januar 1985 am Fachbereich Erziehungswissenschaften der Johann-Wolfgang-Goethe-Universität. Frankfurt a. M., S. 251–265.*

74. Freese, Andrea (1985): *Die Darstellung von Mädchen und Frauen in Berliner Grundschullesebüchern*. Hrsg. von der Gleichstellungsstelle der SPD-Fraktion im Abgeordnetenhaus von Berlin. Berlin.
75. Häußler, Ilse (1985): Das Frauenbild im Schulbuch. In: Die Schleswig-Holsteinische Schule 39, S. 16–17.
76. Hiemer, Anni/Schmidt, Karla/Fichera, Ulrike (1985): Ziel: Der kleine Unterschied. Sexismus in Schulbüchern und was dagegen getan werden muß. In: PÄD extra 5, S. 38–41.
77. Relleke, Walburga (1985): Wenige Frauen in den Religionsbüchern. In: Religionsunterricht an höheren Schulen 28(4), S. 256–257.
78. Robbe, Angelika (1985): „O, be a fine girl, kiss me right now“ oder: Wie Mädchen in Physikbüchern vorkommen (wenn sie vorkommen). In: Frauen + Schule – Zeitschrift für Mädchen- und Frauenbildung 7, S. 12–14.
79. Schliep, Angelika (1985): Bio-Bücher – allgemein: halb so viele Frauen wie Männer, dafür im Kapitel Sexualerziehung auch mal doppelt so viele ... In: Frauen + Schule – Zeitschrift für Mädchen- und Frauenbildung 7, S. 15–17.
80. Schmeling, Christiane (1985): Das Frauenbild im Englischlehrwerk. In: Block, Irene/Pfister, Gertrud/Rieger, Ursula/Schmeling, Christiane (Hrsg.): *Feminismus in der Schule*. Tagungsbeiträge der 3. Frauen und Schule-Tagung vom 8.–11. Juni 1984 in Berlin. Berlin, S. 147–175.
81. Schweitzer, Ingrid (1985): Auch heute noch: Sexismus in Fibeln? Eine Analyse. In: Valtin, Renate/Warm, Ute (Hrsg.): *Frauen machen Schule*. Probleme von Mädchen und Lehrerinnen in der Grundschule. Frankfurt a. M., S. 69–74.
82. Völkel, Karin (1985): „Wenn es am allerschönsten ist ...“ – Eine Analyse zugelassener Sexualkundebücher des Landes West-Berlin. In: Block, Irene/Pfister, Gertrud/Rieger, Ursula/Schmeling, Christiane (Hrsg.): *Feminismus in der Schule*. Tagungsbeiträge der 3. Frauen und Schule-Tagung vom 8.–11. Juni 1984 in Berlin. Berlin, S. 192–208.
83. Vogt, Heidemarie (1985): Ein leidiges Thema: Rollenklischees in Schulbüchern. In: Valtin, Renate/Warm, Ute (Hrsg.): *Frauen machen Schule*. Probleme von Mädchen und Lehrerinnen in der Grundschule. Frankfurt a. M., S. 75–80.
84. Dick, Anneliese (1986): *Kommentierte Bibliographie: Rolle und Bild der Frau in deutschen Schulbüchern*. Hrsg. vom Hessischen Institut für Bildungsplanung und Schulentwicklung. Wiesbaden.
85. Enders-Dragässer, Uta (1986): Männliche Selbstbestätigung und bürgerliche Normalität im deutschen Schulbuch: Heilmittel gegen die multikulturelle Gesellschaft? In: Informationsdienst zur Ausländerarbeit 3, S. 81–85.
86. Epple, Eva-Maria (1986): Zwei Jungen steigen blaß aus der Geisterbahn – bald schon im Lesebuch möglich? In: Frauen + Schule – Zeitschrift für Mädchen- und Frauenbildung 12, S. 20–21.
87. Fichera, Ulrike/Weyershäuser, Elma (1986): „... Die Frau muß hinaus ins feindliche Leben ...“ – Welche Bilder von Weiblichkeit bzw. Männlichkeit sollen die Unterrichtsmaterialien vermitteln? In: Enders-Dragässer, Uta/Stanzel, Gabriele (Hrsg.): *Frauen Macht Schule*. Dokumentation der 4. Fachtagung der AG Frauen und Schule. Frankfurt a. M., S. 109–119.
88. Fichera, Ulrike/Weyershäuser, Elma (1986): *Hilfen zur Beurteilung von Schulbüchern*. In: Enders-Dragässer, Uta/Stanzel, Gabriele (Hrsg.): *Frauen Macht Schule*. Dokumentation der 4. Fachtagung der AG Frauen und Schule. Frankfurt a. M., S. 185–186.

89. Glötzner, Johannes (1986): Die Rolle der Frau in Mathematikbüchern – wie gehabt. In: Vorgänge – Zeitschrift für Bürgerrechte und Gesellschaftspolitik 3, 112.
90. Hauser, Sylvia/Nave-Herz, Rosemarie (1986): *Herrin – Traumfrau – Arbeiterin? Thema „Frauen-Rollen“/„Geschlechterrollenverhalten“ im Deutsch-Unterricht – eine annotierte Bibliographie*. Hrsg. von der Parlamentarische Staatssekretärin für die Gleichstellung von Frau und Mann beim Ministerpräsidenten des Landes Nordrhein-Westfalen. Düsseldorf.
91. Hohmann, Joachim S. (1986): Frauen und Mädchen in faschistischen Lesebüchern und Fibeln. Köln.
92. Kugler, Christine (1986): Das Bild der Frau in den Lese- und Sprachbüchern, die im Unterricht bei Gehörlosen Verwendung finden. In: Hörgeschädigtenpädagogik 40(6), S. 327–338.
93. Olma, Susanne/Hermes, Liesel (1986): „Mother is in the kitchen“. Geschlechterrollenerziehung im Englischunterricht. In: Englisch 21(3), S. 93–97.
94. Rampillon, Ute (1986a): *Gleichberechtigung im Englischunterricht: Zur Darstellung von Frauen- und Männerrollen in Englischbüchern der Sekundarstufe I*. In: *Praxis des neu-sprachlichen Unterrichts* 33, S. 138–191.
95. Rampillon, Ute (1986b): *Die Darstellung von Frauen- und Männerrollen in Schulbüchern*. In: *Amtsblatt des Kultusministeriums von Rheinland-Pfalz* Nr. 10, S. 313–315.
96. Schönberger, Annelore (1986): „Und drinnen waltet die züchtige Hausfrau“ – Über die Gleichberechtigung im Schulbuch. In: Deutscher Gewerkschaftsbund/Landesverband Hessen/Landesfrauenausschuss (Hrsg.): „... Und drinnen waltet die züchtige Hausfrau“. Über die Gleichberechtigung im Schulbuch. Dokumentation der Veranstaltung vom 22. Februar 1986. Frankfurt a. M., S. 1–6.
97. Selbmann, Frank (1986): Das Mädchen- und Frauenbild im Lese- und Arbeitsbuch der Schule für Lernbehinderte. Eine sozialwissenschaftliche Untersuchung. In: Behinderten-Pädagogik 25(4), S. 384–400.
98. Völpel, Susanne (1986): Geschlechtsspezifische Rollenklischees in der Personendarstellung zweier Französisch-Lehrbücher des Anfangsunterrichts „Cours de base“ und „Echanges“ im Vergleich. In: Französisch heute 17(1), S. 381–384.
99. Enders-Dragässer, Uta (1987): *Das Frauen- und Mädchenbild im Schulbuch*. In: Grossmann, Wilma/Naumann, Britta (Hrsg.): *Frauen- und Mädchenrollen in Kinder- und Schulbüchern. Dokumentation der Tagung der Max-Traeger-Stiftung vom 7.-9. November 1986 in Schmitten/Taunus*. Frankfurt a. M., S. 1–12.
100. Fichera, Ulrike/Weyershäuser, Elma (1987): „... und drinnen waltet der züchtige Hausmann ...“ – Gedanken zu frauenorientierten, nicht-sexistischen Schulbüchern und Unterrichtsmaterialien. In: Prengel, Annedore (Hrsg.): *Schulbildung und Gleichberechtigung. Dokumentation des internationalen Symposions 20.–21. Juni 1986 in Frankfurt a. M.* Frankfurt a. M., S. 291–308.
101. Hofer, Maria (1987): *Zur Theorie und Praxis eines Bereichs österreichischer Schulbuchforschung. Theoretische und methodologische Grundlagen zur Analyse der Frauendarstellung in Schulbüchern und kritische Bestandsaufnahme der in Österreich zwischen 1980 und 1985 veröffentlichten Analysen*. Wien.
102. Glötzner, Johannes (1987): Sexismus in neuen Mathematikbüchern. Buben und Männer sind aktiv, Mädchen und Frauen sind für Kinder und Küche zuständig. In: *Pädagogik heute* 3, S. 19–20.
103. Langner, Ingo (1987): *Frauen: Randfiguren des Lebens. Untersuchung zur Darstellung von Mädchen und Frauen in Mathematikbüchern*. In: *Pädagogik heute* 3, S. 20–22.

104. *Prengel, Annedore (1987): Gleichberechtigung in Schulbüchern? In: Grossmann, Wilma/Naumann, Britta (Hrsg.): Frauen- und Mädchenrollen in Kinder- und Schulbüchern. Dokumentation der Tagung der Max-Traeger-Stiftung vom 7.–9. November 1986 in Schmitten/Taunus. Frankfurt a. M., S. 40–55.*
105. *Stelten, Herbert (1987): Die Frau im Schulbuch. In: PÄD extra [Juni], S. 22–23.*
106. *Backes, Adelheid u. a. (1988): Mädchen und Frauen in Büchern der Grundschule. Gutachten der Kommission „Rollenklischees in Schulbüchern“. Hrsg. vom Chef der Staatskanzlei, Leitstelle zur Durchsetzung der Gleichberechtigung der Frauen, der Minister für Kultus, Bildung und Wissenschaft. Saarbrücken.*
107. *Niedersächsisches Kultusministerium (Hrsg.) (1988): Bericht über die Maßnahme „Darstellung der Familie und der Rolle der Frau im Schulbuch“. Hannover.*
108. *Schmökel, Kerstin (1988): Werden im Mathematikunterricht Geschlechtsrollen vermittelt? Eine inhaltsanalytische und sozialisationstheoretische Auseinandersetzung mit zwei repräsentativen Mathematiklehrbüchern für das 4. Schuljahr. Hannover.*
109. *Donat, Christiane/Henke, Jutta/Sinzel, Ingrid (1989): Anspruch und Wirklichkeit. Rollenverteilung in Lese- und Sprachbüchern für den Grundschulunterricht. In: Die Grundschule 21(5), S. 54–55.*
110. *Fichera, Ulrike (1989): Vorschläge zur nicht-sexistischen und nicht-rassistischen Darstellung der Geschlechter in Unterrichtsmaterialien. In: Kreienbaum, Maria Anna (Hrsg.): Frauen bilden Macht. Dokumentation des 7. Fachkongresses Frauen und Schule. Dortmund, S. 213–223.*
111. *Lopatecki, Constanze/Lüking, Irene (1989): Bescheiden, sittsam und rein? Rollenklischees in Mathematik-Schulbüchern für die Sekundarstufe I. Hrsg. von der Bremischen Zentralstelle für die Verwirklichung der Gleichberechtigung der Frau. Bremen.*
112. *Meyer-Herbst, Irene (1989): Moderne Zeiten? Zur Darstellung von Frauen- und Männerrollen in neueren Englischlehrwerken. In: Praxis des neusprachlichen Unterrichts 36(3), S. 227–237.*
113. *Schütte, Sybille (1989): Anna und die Mathematik – Von den weiblichen Schwierigkeiten im Umgang mit sinnleeren Mathematikaufgaben. In: Grundschule 12, S. 23–25.*

## 1990er Jahre

114. *Fichera, Ulrike (1990): Schluß mit den sexistischen Stereotypen in Schulbüchern! Gedanken zu frauenorientierten Darstellungen von Mädchen und Frauen in Unterrichtsmaterialien. In: Enders-Dragässer, Uta/Fuchs, Claudia (Hrsg.): Frauensache Schule. Aus dem deutschen Schulalltag: Erfahrungen, Analysen, Alternativen. Frankfurt a. M., S. 257–279.*
115. *Ryll, Kerstin (1990): Frauen-, Männer- und Altenbilder in den Muttersprachen der 50er und 60er Jahre. Berlin.*
116. *Blimlinger, Eva (1991): The Invisibles. Frauen und Frauengeschichte in österreichischen Schulbüchern für Geschichte und Sozialkunde. In: Schulheft 63 „Angekreidet! Sexismus in Schule & Bildung“, S. 71–85.*
117. *Dick, Anneliese (1991): Rollenbilder von Männern und Frauen, Jungen und Mädchen in Schulbüchern. Anregungen zu ihrer Behandlung im Unterricht der Primarstufe und Sekundarstufe I. Wiesbaden.*

118. Kees, Margarete u. a. (1991): *Mädchen und Frauen in Lesebüchern der Sekundarstufe 1. Im Auftrag des Ministeriums für Frauen, Arbeit, Gesundheit und des Ministeriums für Bildung und Sport. Saarbrücken.*
119. Mayer-Mali, Rita/Ranftl-Guggenberger, Doris (1991): Schulbücher für Mathematik und Informatik. In: Bundesministerium für Unterricht und kulturelle Angelegenheiten (Hrsg.): *MUT – Mädchen und Technik*. Wien, S. 65–69.
120. Tschenet, Roswitha (1991): *Sexismus in Schule und (Aus)Bildung. Neuere Daten und Forschungsergebnisse zur Situation in Österreich*. In: *Schulheft 63 „Angekreidet! Sexismus in Schule & Bildung“*, S. 9–22.
121. Bettge, Susanne H. (1992): Geschlechtsunterschiede in Erfolgserwartungen in Abhängigkeit von der Formulierung von Mathematik-Textaufgaben. In: *Zeitschrift für Sozialpsychologie* 23, S. 46–53.
122. Schütte, Sybille (1993): Muss ich jetzt plus, minus, mal oder geteilt rechnen? – Von einigen Schwierigkeiten, die Mädchen mit Textaufgaben haben und was wir daraus lernen können. In: *Mathematische Unterrichtspraxis – Zeitschrift für den Mathematikunterricht an Grund- und Hauptschulen* 2, S. 17–28.
123. Hartmann, Jutta (1993/94): Was sagen Schulbücher zu Mädchen und Jungen und Frauen und Männern? Hrsg. von der Zentralen Frauenbeauftragten der Technischen Universität Berlin. Berlin.
124. Beyer, Katrin (1994): Zur Sozialisation in der Schule. Schulbücher aus Ost und West. In: Stecker, Heidi/Bütow, Birgit (Hrsg.): *EigenArtige Ostfrauen. Frauenemanzipation in der DDR und den neuen Bundesländern*. Bielefeld, S. 198–209.
125. Fichera, Ulrike (1994): Von „züchtigen Hausfrauen“ über Werkzeugmacherinnen zu ...? *Einige Ergebnisse der feministischen Schulbuchkritik*. In: *Diskussion Deutsch* 136, S. 114–119.
126. Hempel, Marlies (1994): Mädchen und Jungen im Schulbuch. Das Geschlechterverhältnis in den Schulbüchern des Sachunterrichts und der politischen Bildung. Potsdam.
127. Kaiser-Meßmer, Gabriele (1994): *Analyse ausgewählter Schulbücher unter geschlechtsspezifischen Aspekten*. In: *Beiträge zum Mathematikunterricht 1994*, S. 171–174.
128. Lindner, Viktoria/Lukesch, Helmut (1994): *Geschlechtsrollenstereotype im deutschen Schulbuch: eine inhaltsanalytische Untersuchung von Schulbüchern für Grund-, Haupt- und Realschulen der Fächer Deutsch, Mathematik, Heimat- und Sachkunde sowie Religionslehre in Bayern, Nordrhein-Westfalen und der ehemaligen DDR, zugelassen im Zeitraum von 1970 bis 1992*. Regensburg.
129. Niederdrenk-Felgner, Cornelia (1994): Was ist schon dabei, wenn Frau Abel den Kühlschrank bezahlt? Aus der Arbeit an einem Mathematikbuch. In: *Beiträge zum Mathematikunterricht 1994*, S. 267–270.
130. Rath, Angelika (1994): Passt Ihnen diese Brille? Zum Bild von Frauen und Männern in neueren Lehrwerken für Deutsch als Fremdsprache. In: *Zielsprache Deutsch* 25(4), S. 222–230.
131. Thiel, Andrea (1994): Immer im Familientrott! Was vermitteln Fibeln? Hrsg. von der Zentralen Frauenbeauftragten der Technischen Universität Berlin. Berlin.
132. Niederdrenk-Felgner, Cornelia (1995): *Textaufgaben für Mädchen – Textaufgaben für Jungen*. In: *Mathematik lehren* 68, S. 54–57.
133. Breiner, Ingeborg (1996): *Die Frau im deutschen Lexikon. Eine sprachpragmatische Untersuchung*. Wien.

134. Fichera, Ulrike (1996): *Die Schulbuchdiskussion in der BRD – Beiträge zur Neugestaltung des Geschlechterverhältnisses. Bestandsaufnahme und Sekundäranalyse.* Frankfurt a. M.
135. Klevenow, Gert-Holger (1996): *Geschlechtsspezifische Interessenschwerpunkte und berufliche Orientierungen in der Phase der Berufswahlvorbereitung.* In: Schober, Karen/Gaworek, Maria (Hrsg.): *Berufswahl: Sozialisations- und Selektionsprozesse an der ersten Schwelle.* Nürnberg, S. 97–113.
136. Panzner, Antje A. (1996): „Haunted by Peggy“: Zur Darstellung von Mädchen- und Frauen gestalten in Englischlehrbüchern der DDR. In: *Neusprachliche Mitteilungen aus Wissenschaft und Praxis* 49(1), S. 38–42.
137. Adick, Christel (1997): Mädchen und Frauen in Bilder- und Schulbüchern. Bestandsaufnahme und interkultureller Vergleich. In: Schäfer, Gudrun/Wecker, Rose (Hrsg.): *Konstruktionen von Weiblichkeit. Blicke auf das Fremde.* Pfaffenweiler, S. 81–103.
138. Paseka, Angelika (1997): Alle arbeiten oder nicht? Eine Einführung in die Welt der Schulbücher. In: Lassnigg, Lorenz/Paseka, Angelika (Hrsg.): *Schule weiblich – Schule männlich. Zum Geschlechterverhältnis im Bildungswesen.* Innsbruck/Wien, S. 130–132.
139. Preinsperger, Alexandra/Weisskircher, Elisabeth (1997): *Mathematikschulbücher. Eine aktuelle Untersuchung.* In: Lassnigg, Lorenz/Paseka, Angelika (Hrsg.): *Schule weiblich – Schule männlich. Zum Geschlechterverhältnis im Bildungswesen.* Innsbruck/Wien, S. 132–146.
140. Scheer, Monika (1997): *Gleichberechtigung von Mädchen und Jungen, Frauen und Männern in Schulbüchern des Landes Sachsen-Anhalt. Studie im Auftrag des Kultusministeriums des Landes Sachsen-Anhalt. Hrsg. vom Kultusministerium des Landes Sachsen-Anhalt. Referat für Gleichstellungsangelegenheiten.* Magdeburg.
141. Schäfer, N. (1998): Die geschlechtsspezifische Vereinnahmung in einem Englischbuch. In: Grunder, Hans-Ulrich (Hrsg.): *Sozialisiert und diszipliniert. Die Erziehung „wilder Kinder“.* Baltmannsweiler, S. 195–205.
142. Fäcke, Christiane (1999): *Egalität – Differenz – Dekonstruktion. Eine inhaltskritische Analyse deutscher Französisch-Lehrwerke.* Berlin.
143. Raffener, Evelyn/Thüne, Eva-Maria (1999): „Seit er gestorben ist, wollte sie nicht mehr lesen“ – Sprache und Geschlecht in deutschen Grammatiken. In: Thüne, Eva-Maria (Hrsg.): *Deutsch lernen und lehren in Italien.* Padova, S. 185–205.
144. Thomas, Susanne (1999): *Analyse neuerer Schulbücher unter geschlechtsspezifischen Aspekten. Dargestellt an Mathematiklehrbüchern für das 5. bis 10. Schuljahr.* Göttingen [CD-Rom].

Weitere bis 1993 verfasste unveröffentlichte Schulbuchanalysen und „Emanzipationssplitter-Analysen“ sind in Fichera (1996) bibliographiert.

## 2000er Jahre

145. Fischer, Hiltrud (2000): *Rosa Strümpfe und kein Kakao. Geschlechtsspezifische Sozialisation in der Schule heute? Das Frauen- und Mädchenbild in bayerischen Schulbüchern.* Norderstedt.
146. *Frauen- und Gleichstellungsbeauftragte der Landesregierung Mecklenburg-Vorpommern (Hrsg.) (2000): Mädchen und Jungen – Berücksichtigung und Förderung ihrer besonderen Möglichkeiten in der Schule.* Schwerin.

147. Hasenhüttl, Erika (2001): *Feministisch angehaucht? Zur Genderfrage in der Lehrerinnen-Ausbildung*. Wien.
148. Schröter, Heike (2002): *Geschichte ohne Frauen? Das Frauenbild in den Schulgeschichtsbüchern der BRD und der DDR von 1949 bis 1989*. Frankfurt a. M.
149. Hunze, Annette (2003): *Geschlechtertypisierung in Schulbüchern*. In: Stürzer, Monika u. a. (Hrsg.): *Geschlechterverhältnisse in der Schule*. Opladen, S. 53–82.
150. Miehl, Sandra (2003): *Von „altpusserin“ bis „zun Huren gehen“*. *Die Darstellung der Geschlechter in Sprachlehrwerken für das Deutsche als Fremdsprache vom 15. bis zum 17. Jahrhundert*. Münster/Hamburg/Berlin.
151. Eisermann, Sonja Iris (2004): *Berufsbezeichnungen für Frauen vom 16.–19. Jahrhundert. Eine sprachhistorische Untersuchung insbesondere des In-Derivationsmorphems unter Berücksichtigung prototypensemantischer Aspekte beim Bedeutungswandel*. Oldenburg.
152. Freudenberg-Findeisen, Renate (2004): *Frauen- und Männerbilder. Beobachtungen in Lehrwerken für Deutsch als Fremdsprache*. In: Eichhoff-Cyrus, Karin M. (Hrsg.): *Adam, Eva und die Sprache. Beiträge zur Geschlechterforschung*. Mannheim u. a., S. 248–264.
153. Kunkel-Razum, Kathrin (2004): *Die Frauen und der Duden – der Duden und die Frauen*. In: Eichhoff-Cyrus, Karin M. (Hrsg.): *Adam, Eva und die Sprache. Beiträge zur Geschlechterforschung*. Mannheim u. a., S. 308–315.
154. Voigt-Köhler, Inge/Eydner, Sylvia (2004): *Rollenbilder in Lernsoftware: der starke Apotheker forscht mutig im U-Boot ... und andere Klischees*. In: Malz-Teske, Regina/Reich-Gerick, Hannelore (Hrsg.): *Frauen und Schule: gestern – heute – morgen*; 13. Bundeskongress Frauen und Schule. Bielefeld, S. 347–352.
155. Volkmann, Angela (2004): *„Eva, wo bist du?“ – die Geschlechterperspektive im Religionsunterricht am Beispiel einer Religionsbuchanalyse zu biblischen Themen*. Würzburg.
156. Kohser-Spohn, Christiane (2005): *Die Kategorie Geschlecht in der Geschichtswissenschaft und in der Geschichtsdidaktik in Deutschland. Rückblick und Ausblick*. In: *Internationale Schulbuchforschung* 27, S. 157–166.
157. Ehlers, Swantje (2006): *Die Struktur der deutschen und ausländischen Familie im Lesebuch für den Deutschunterricht der Gegenwart*. In: Matthes, Eva/Heinze, Carsten (Hrsg.): *Die Familie im Schulbuch*. Bad Heilbrunn, S. 319–340.
158. Miller-Kipp, Gisela (2006): *Geschlechterrollen und „erzieherlicher Zweck“ in Fibeln des „Dritten Reiches“*. In: Teistler, Gisela (Hrsg.): *Lesen lernen in Diktaturen der 1930er und 1940er Jahre. Fibeln in Deutschland, Italien und Spanien*. Hannover, S. 131–154.
159. Wicki, Monika (2006): *Die Mütter, Hüterinnen der sittlichen Ordnung und Ursache des gesellschaftlichen Niedergangs. Generationenbeziehungen in Lesebüchern der deutschsprachigen Schweiz zwischen 1884 und 2000*. In: Matthes, Eva/Heinze, Carsten (Hrsg.): *Die Familie im Schulbuch*. Bad Heilbrunn, S. 65–88.
160. Windischbauer, Elfriede (2006): *Geschlechtersensibler Geschichtsunterricht? Die Rolle österreichischer Geschichtsschulbücher von den 1960er Jahren bis heute*. In: *Geschlechtergeschichte – Geschlechterpolitik – Gender Mainstreaming*. Hrsg. vom Forum Politische Bildung. Innsbruck/Bozen/Wien.
161. Bauer, Alexandra (2007): *Frauen und Mädchen in den Geschichtsbüchern der Hauptschulen – ein aus der Mode gekommenes Thema?* In: Grohn-Menard, Christin (Hrsg.): *Bildung neu bilden: Balancen finden*; 14. Bundeskongress Frauen und Schule Potsdam. Bielefeld, S. 423–442.
162. Finsterwald, Monika/Ziegler, Albert (2007): *Geschlechtsrollenerwartungen vermittelt durch Schulbuchabbildungen der Grundschule*. In: Ludwig, Peter H./Ludwig, Heidrun

- (Hrsg.): Erwartungen in Himmelblau und rosarot. Effekte, Determinanten und Konsequenzen von Geschlechterdifferenzen in der Schule. Weinheim, S. 117–141.
163. Markom, Christa/Weinhäupl, Heidi (2007): *Die Anderen im Schulbuch. Rassismen, Exotismen, Sexismen und Antisemitismus in österreichischen Schulbüchern*. Wien.
  164. Prechtel, Markus/Reiners, Christiane S. (2007): Wie der Chemieunterricht Geschlechterdifferenzen inszeniert. In: *Chemikon* 14, S. 21–29.
  165. Schärer, Franziska (2008): *Père, mère, roi et sorcière. La représentation des deux sexes et de la catégorie du genre dans les manuels scolaires de l'école primaire de la Suisse alémanique et de la Suisse romande*. Bern.
  166. Köhler, Tim (2009): Evolution ohne Frauen? Bedeutung des Geschlechtes in der Darwinrezeption im Schulbuch um 1900. In: Glaser, Edith/Andresen, Sabine (Hrsg.): *Disziplingeschichte der Erziehungswissenschaft als Geschlechtergeschichte*. Opladen/Farmington Hills, Mich., S. 121–128.
  167. Majjala, Minna (2009): Typisch Frau ... Typisch Mann ... – Zur Gender-Problematik in Lehrwerken für Deutsch als Fremdsprache. In: *Zielsprache Deutsch* 36(1), S. 33–60.
  168. Sylvester-Habenicht, Erdmute (2009): *Kanon und Geschlecht: Eine Re-Inspektion aktueller Literaturgeschichtsschreibung aus feministisch-genderorientierter Sicht*. Sulzbach.

## 2010er Jahre

169. Stohler, Ursula/Bodnar, Nicole (2010): Die Didaktik an der Grenze zur Genderforschung. Geschlechterstereotypen im Schulbuch „Bonne Chance“. In: Bühler, Patrick/Bühler, Thomas/Osterwalder, Fritz (Hrsg.): *Grenzen der Didaktik*. Bern, S. 123–140.
170. Bal, Mihriban (2011): „Ich werd ja doch nur Hausfrau!“ Eine Untersuchung aktueller Schulbücher zum Mathematikunterricht nach Geschlechterrollenstereotype. [Print on demand.]
171. Leifert, Birgit (2011): *Geschlecht und Geschlechterverhältnisse im sozialwissenschaftlichen Schulbuch. Neue Erkenntnispotenziale durch die Erschließung der Objektiven Hermeneutik Oevermanns für den Gegenstand*. In: *Politisches Lernen*, 29(3/4), S. 30–38.
172. Postupa, Jennifer/Weth, Thomas (2011): *Mathematikaufgaben im Spiegel ihrer Zeit*. In: Matthes, Eva/Schütze, Sylvia (Hrsg.): *Aufgaben im Schulbuch*. Bad Heilbrunn, S. 165–182.
173. Bittner, Melanie (2012): *Geschlechterkonstruktionen und die Darstellung von Lesben, Schwulen, Bisexuellen, Trans\* und Inter\* (LSBTI) in Schulbüchern. Eine gleichstellungsorientierte Analyse im Auftrag der Max-Traeger-Stiftung*. Frankfurt a. M.
174. Eickhoff, Birgit (2012): „Frauen in den Duden“ – Werkstattbericht I aus der Dudenredaktion. In: Günthner, Susanne/Hüpper, Dagmar/Spieß, Constanze (Hrsg.): *Genderlinguistik. Sprachliche Konstruktionen von Geschlechtsidentität*. Berlin/New York, S. 195–212.
175. Kunkel-Razum, Kathrin (2012): „Er sah zu ihr auf wie zu einer Göttin“ statt „Sie sah zu ihm auf wie zu einem Gott“ (Luise Pusch)? – Werkstattbericht II aus der Dudenredaktion. In: Günthner, Susanne/Hüpper, Dagmar/Spieß, Constanze (Hrsg.): *Genderlinguistik. Sprachliche Konstruktionen von Geschlechtsidentität*. Berlin/New York, S. 213–221.
176. Moser, Franziska/Hannover, Bettina/Becker, Judith (2013): *Subtile und direkte Mechanismen der sozialen Konstruktion von Geschlecht in Schulbüchern. Vorstellung eines Kategoriensystems zur Analyse der Geschlechter(un)gerechtigkeit von Texten und Bildern*. In: *Gender. Zeitschrift für Geschlecht, Kultur und Gesellschaft* 5(3), S. 77–93.



177. Moser, Franziska (2013): *Social Construction of Gender-(un)fairness. An Analysis of Educational Material and Individual Language Use. Dissertation, Freie Universität Berlin.*
178. Moser, Franziska/Hannover, Bettina (2014): *How gender fair are German schoolbooks in the twenty-first century? An analysis of language and illustrations in schoolbooks for mathematics and German. In: European Journal of Psychology of Education 29(3), S. 387–407.*
179. Ott, Christine (2014): *Das Schulbuch beim Wort nehmen. Linguistische Methodik in der Schulbuchforschung. In: Knecht, Petr/Matthes, Eva/Schütze, Sylvia/Aamotsbakken, Bente (Hrsg.): Methodologie und Methoden der Schulbuch- und Lehrmittelforschung. Bad Heilbrunn, S. 254–263.*
180. Stürmer, Verena (2014): *Kindheitskonzepte in den Fibeln der SBZ/DDR 1945–1990. Bad Heilbrunn.*
181. Ott, Christine (2015): *Innocent Maths? Gender Representations in German Maths Books or How to Extract Tacit and Explicit Knowledge on Gender from Word Problems. In: Mills, Sara/Mustapha, Abolaji S. (Hrsg.): Gender Representation in Learning Materials. International Perspectives. New York/London, S. 52–63.*
182. Bittner, Melanie (2015): *Die Ordnung der Geschlechter in Schulbüchern. Heteronormativität und Genderkonstruktionen in Englisch- und Biologiebüchern. In: Schmidt, Friederike/Schondelmayer, Anne-Christin/Schröder, Ute B. (Hrsg.): Selbstbestimmung und Anerkennung sexueller und geschlechtlicher Vielfalt. Lebenswirklichkeiten, Forschungsergebnisse und Bildungsbausteine. Wiesbaden, S. 247–260.*

**ANHANG 3–1: Untersuchungskorpus mit Siglen**

Die Aufstellung ist gegliedert nach Fach, Reihe und Erscheinungsjahr. In den bibliographischen Angaben der Schulbücher abgekürzte Vornamen sind übernommen, sofern die Recherche über den Bayerischen Verbundkatalog und den Karlsruher Virtuellen Katalog keine ausführlicheren Angaben erbrachte.

| Nr.                       | Kürzel | Titel                                                                                                                                                                                                                                                                     |
|---------------------------|--------|---------------------------------------------------------------------------------------------------------------------------------------------------------------------------------------------------------------------------------------------------------------------------|
| <b>Rechnen/Mathematik</b> |        |                                                                                                                                                                                                                                                                           |
| 1                         | HEU-90 | Heuner, Johann Friedrich ( <sup>159</sup> 1890): Aufgaben zum Kopf- und Ziffernrechnen. Schüler-Ausgabe für Landschulen. Heft C. Oberklasse. Ansbach: Friedrich Seybold's Buchhandlung.                                                                                   |
| 2                         | BW-99  | Backhaus, Karl/Wiese, Bertold ( <sup>3</sup> 1899): Rechenbuch für mehrklassige Volksschulen. Siebentes Heft. Bielefeld/Leipzig: Velhagen & Klasing.                                                                                                                      |
| 3                         | SRB-28 | Lindenmayer, Anton/Ritthaler, Anton ( <sup>3</sup> 1928): Rechenbuch für schwäbische Volksschulen. 7. Heft. Bamberg: C. C. Buchners Verlag.                                                                                                                               |
| 4                         | RB-30  | Lindner, Johann (1930): Rechenbuch für die Volkshauptschule. Nach der bayerischen Lehrordnung bearbeitet. 7. Heft/7. Schülerjahrgang. München: Kösel & Friedrich Pustet, Abt. Schulwissenschaftlicher Verlag.                                                             |
| 5                         | RB2-30 | Wolfinger, Viktor (1930): Rechenbuch für die Volkshauptschule. Siebenter Schülerjahrgang. Bearbeitet von Georg Heider. München: R. Oldenbourg.                                                                                                                            |
| 6                         | RB2-36 | Wolfinger, Viktor ( <sup>10</sup> 1936): Rechenbuch für die Volkshauptschule. Siebenter Schülerjahrgang. Bearbeitet von Georg Heider. Mit einem Anhang neuzeitlicher Aufgaben. München: R. Oldenbourg.                                                                    |
| 7                         | RB-29  | Küffner, Eduard/Ruckert, Aloys J. (1929): Rechenbuch für die Volkshauptschule. Nach der bayerischen Lehrordnung neubearbeitet von August Müller. 7. Heft, 7. Schülerjahrgang. Würzburg: F. X. Bucher.                                                                     |
| 8                         | RB3-30 | Dengler, Frz./Reichart, W./Vilsmeier, J. (1930): Rechenbuch für Volkshauptschulen. Heft 7. Bearbeitet nach der Lehrordnung für die bayerischen Volksschulen vom 15.12.1926. Freising-München: Datterer & Cie.                                                             |
| 9                         | BRB-39 | Lindenmayer, Anton/Ritthaler, Anton ( <sup>11</sup> 1939): Rechenbuch für bayerische Volkshauptschulen. Mit besonderer Berücksichtigung der Landschule neubearbeitet von Otto Ebner. 6./7. Heft. Mit einem Anhang neuzeitlicher Aufgaben. Bamberg: C. C. Buchners Verlag. |

| Nr. | Kürzel  | Titel                                                                                                                                                                                                                                                    |
|-----|---------|----------------------------------------------------------------------------------------------------------------------------------------------------------------------------------------------------------------------------------------------------------|
| 10  | ERB-36  | Lieb, Anton/Sandner, H./Töpfer, A./Wolfrum, Chr. (ca. 1936): Ergänzungsheft zum Rechenbuch für Volkshauptschulen. 6. mit 8. Schülerjahrgang. Nürnberg: Friedrich Korn'sche Buchhandlung. <sup>1</sup>                                                    |
| 11  | BRB-41  | Müller, A./Reger, A./Vollath, P. (1941): Rechenbuch für die bayerischen Volksschulen. 7. Heft. Bamberg/München u. a.: C. C. Buchners/Oldenbourg u. a.                                                                                                    |
| 12  | BRB-46  | Ritthaler, Anton (1946): Rechenbuch für die bayerischen Volksschulen. Heft 7. Hrsg. von der Arbeitsgemeinschaft bayerischer Schulbuchverleger in Zusammenarbeit mit dem Bayerischen Schulbuchverlag. München: Ehrenwirth/Leibniz/Kösel.                  |
| 13  | BVR-51  | Fuchs, Rudolf/Grünwald, Ignaz/Herbst, Hans (1951): Bayerisches Volksschul-Rechenbuch. Heft 7. München: Gemeinschaftsverlag Ehrenwirth/Kösel/Oldenbourg.                                                                                                  |
| 14  | BVR-57  | Herbst, Hans/Grünwald, Ignaz/Fuchs, Rudolf (1957): Bayerisches Volksschul-Rechenbuch. Heft 7. München: Gemeinschaftsverlag Ehrenwirth/Kösel/Oldenbourg.                                                                                                  |
| 15  | BVR-65  | Gärtner, Friedrich/Lubowsky, Günther (Hrsg.) (ca. 1965): Bayerisches Volksschul-Rechenbuch 7. Bearbeitet von Georg Baumann u. a. München: Ehrenwirth.                                                                                                    |
| 16  | WR-51   | Hagen, Michael (Hrsg.) (1951): Wir rechnen. Rechenbuch für bayerische Volksschulen. 7. Schülerjahrgang. Bearbeitet von Albert Schlagbauer und Michael Hagen. Bamberg/Freising/Würzburg: Bucher/Buchner/Datterer & Cie.                                   |
| 17  | WR-57   | Hagen, Michael (Hrsg.) (1957): Wir rechnen. Rechenbuch für Volksschulen. 7. Schülerjahrgang. Bearbeitet von Wilhelm Eyselein und Michael Hagen. Bamberg/Freising/Würzburg: Buchner/Datterer & Cie./Bucher.                                               |
| 18  | WR-64   | Schlagbauer, Albert/Rabenstein, Reiner (Hrsg.) (ca. 1964): Wir rechnen. Für die Hauptschule. 7. Schülerjahrgang. Bearbeitet von Wilhelm Eyselein und Richard Clemens. Bamberg/Freising/Würzburg: Buchner/Sellier/Bucher.                                 |
| 19  | HRB-55  | Meins, Hugo (1955): Hamburger Rechenbuch für das 7. Schuljahr. Hamburg: Verlag der GdF.                                                                                                                                                                  |
| 20  | UR-N-63 | Gschwindt, Friedrich/Heberle, Eugen/Moosmann, Emil/Ruffler, Richard (Hrsg.) (ca. 1963): Unser Rechenbuch für Nordrhein-Westfalen 7/8. Bearbeitet von Arbeitskreisen aus dem Münsterland, dem Rhein-Ruhr-Gebiet und Ostwestfalen-Lippe. Stuttgart: Klett. |

<sup>1</sup> „6. mit 8.“ meint 6. bis 8. Jahrgangsstufe, vgl. *Bayerische Lehrordnung für Volksschulen zur Unterteilung in Unter- und Oberstufe der Volksschule*, Bekanntmachung des Staatsministeriums für Unterricht und Kultus vom 15.12.1926 Nr. IV 49242 über die Lehrordnung für die bayerischen Volksschulen, S. 128.

| Nr. | Kürzel   | Titel                                                                                                                                                                                                                                               |
|-----|----------|-----------------------------------------------------------------------------------------------------------------------------------------------------------------------------------------------------------------------------------------------------|
| 21  | UR-B-66  | Gschwindt, Friedrich/Heberle, Eugen/Moosmann, Emil/Ruffler, Richard (Hrsg.) (1966): Unser Rechenbuch für Bayern 7. Bearbeitet von M. Baur u. a. Stuttgart: Klett.                                                                                   |
| 22  | BR-68    | Griesing, Walter/Luscher, Horst/Wagemann, Elmar B. (Hrsg.) (1968): Das Bagel-Rechenbuch für die Hauptschule. Rechnen und Mathematik für den differenzierenden Unterricht. 7. Schuljahr. Bearbeitet von Dieter Eichler. Düsseldorf: Bagel Verlag.    |
| 23  | MHS-B-79 | Lemnitzer, Konrad/Meierhöfer, Bernd/Wolf, Karl (Hrsg.) (1979): Mathematik für Hauptschulen 7. Unter Mitwirkung von Friedrich Barth und Walter Popp. München/Kulmbach: Ehrenwirth/Baumann.                                                           |
| 24  | BHS-78   | Kuntze, Karlheinz/Sattler, Alfred (Hrsg.) (1978): Bausteine der Mathematik in der Hauptschule. 7. Jahrgangsstufe. Bearbeitet von Richard Steuerer u. a. München/Hannover: Oldenbourg/Schroedel.                                                     |
| 25  | WdZ-A-51 | Kruckenber, Adolf (Hrsg.) (1951): Die Welt der Zahl. Zwischen Hochofen und Förderturm. Rechenbuch für Volksschulen im Industriegebiet. Ausgabe A. Heft 7: VII. und VIII. Schuljahr. Unter Mitarbeit von Schulte-Mattler. Hannover: Schroedel.       |
| 26  | WdZ-B-65 | Oehl, Wilhelm (Hrsg.) (1965): Die Welt der Zahl. Rechenbuch für bayerische Volksschulen. 7. Schülerjahrgang. Bearbeitet von Käthe Aigner u. a. München/Hannover: Oldenbourg/Schroedel.                                                              |
| 27  | WdZ-N-68 | Oehl, Wilhelm/Palzkill, Leonard (Hrsg.) (1968): Die Welt der Zahl – Rechenwerk für die Grund- und Hauptschule. Allgemeine Ausgabe für Nordrhein-Westfalen. Neubearbeitung 1967/68. 7. Schuljahr. Bearbeitet von H. Brüggemann. Hannover: Schroedel. |
| 28  | WdZ-B-78 | Oehl, Wilhelm/Palzkill, Leonard (Hrsg.) (1978): Die Welt der Zahl – Neu. Mathematisches Unterrichtswerk für Grund- und Hauptschule. Ausgabe Bayern. 7. Jahrgangsstufe. Bearbeitet von G. Bongartz u. a. München/Hannover: Oldenbourg/Schroedel.     |
| 29  | WdZ-B-86 | Oehl, Wilhelm/Palzkill, Leonard/Rinkens, Hans-Dieter (Hrsg.) (1986): Die Welt der Zahl für bayerische Hauptschulen. 7. Jahrgangsstufe. Bearbeitet von Heinz Beyer u. a. Hannover: Schroedel.                                                        |
| 30  | LS-B-86  | Schmid, August/Schweizer, Wilhelm (Hrsg.) (1986): LS Mathematik. Algebra 7. Bayern. Bearbeitet von Ralf Gleiß u. a. Stuttgart: Klett.                                                                                                               |
| 31  | LS-B-93  | Schmid, August (Hrsg.) (1993): Lambacher Schweizer. Algebra 7. Bayern. Stuttgart: Klett.                                                                                                                                                            |
| 32  | LS-N-94  | Schmid, August/Weidig, Ingo (Hrsg.) (1994): Lambacher Schweizer 7. Mathematisches Unterrichtswerk für das Gymnasium. Ausgabe Nordrhein-Westfalen. Bearbeitet von Angelika Müller u. a. Stuttgart: Klett.                                            |
| 33  | LS-B-05  | Schmid, August/Weidig, Ingo (Hrsg.) (2005): Lambacher Schweizer 7. Mathematik für Gymnasien. Bayern. Erarbeitet von Herbert Götz u. a. Stuttgart: Klett.                                                                                            |

| Nr. | Kürzel  | Titel                                                                                                                                                                                                              |
|-----|---------|--------------------------------------------------------------------------------------------------------------------------------------------------------------------------------------------------------------------|
| 34  | LS-N-07 | Greulich, Dieter u. a. (2007): Lambacher Schweizer 7. Mathematik für Gymnasien. Nordrhein-Westfalen. Stuttgart: Klett.                                                                                             |
| 35  | ML-07   | Böer, Heinz u. a. (2007): mathe live 7. Mathematik für Sekundarstufe I. [Allgemeine Ausgabe.] Stuttgart: Klett.                                                                                                    |
| 36  | D-B-05  | Schätz, Ulrike/Eisentraut, Franz (Hrsg.) (2005): delta 7. Mathematik für Gymnasien. [Bayern.] Bearbeitet von Jürgen Brandl u. a. Bamberg: C. C. Buchner.                                                           |
| 37  | DN-B-09 | Schätz, Ulrike/Eisentraut, Franz (Hrsg.) (2009): delta – neu 7. Mathematik für Gymnasien. [Bayern.] Bearbeitet von Jürgen Brandl u. a. Bamberg: C. C. Buchner.                                                     |
| 38  | TM-B-03 | Reich, Gerhard/Rothmeier, Günter (Hrsg.) (2003): Thema Mathe – neu 7/II. Mathematik für sechsstufige Realschulen. [Bayern.] Bearbeitet von Rudolf Geipel u. a. Bamberg: C. C. Buchner.                             |
| 39  | ML-B-12 | Kleine, Michael/Ludwig, Matthias/Weixler, Patricia (Hrsg.) (2012): Mathe.Logo 7 II. Realschule Bayern. Bearbeitet von Matthias Ludwig u. a. Bamberg: C. C. Buchner.                                                |
| 40  | ML-S-12 | Kleine, Michael/Ludwig, Matthias (Hrsg.) (2012): Mathe.Logo 7. Sekundarstufe I. Bearbeitet von Eva Fischer u. a. Bamberg: C. C. Buchner.                                                                           |
| 41  | M-B-11  | Englmaier, Christa u. a. (2011): Mathematik 7 II/III. Realschule Bayern. Braunschweig: Bildungshaus Schulbuchverlage/Westermann.                                                                                   |
| 42  | DR-B-86 | Neubert, Kurt/Wölpert, Heinrich (Hrsg.) (1986): Denken und Rechnen 7. Rechenbuch für bayerische Hauptschulen. Bearbeitet von Jürgen Golenia u. a. Braunschweig: Westermann.                                        |
| 43  | WM-B-78 | Neubert, Kurt/Nordmeier, Günter (Hrsg.) (1978): Westermann Mathematik. Ausgabe für Bayern. 7. Jahrgangsstufe der Hauptschule. Bearbeitet von E. Geisreiter, K. Heining und K. Kohlmeier. Braunschweig: Westermann. |
| 44  | MA-B-97 | Rinkens, Hans-Dieter/Wynands, Alexander (Hrsg.) (1997): Mathe aktiv 7. Bearbeitet für bayerische Hauptschulen. Bearbeitet von Alois Amann u. a. Hannover: Schroedel.                                               |
| 45  | MA-B-05 | Bauhoff, Eugen/Wynands, Alexander (Hrsg.) (2005): Mathe aktiv M7. Mathematisches Unterrichtswerk für Hauptschulen. Bearbeitet von Alois Amann u. a. Braunschweig: Bildungshaus Schulbuchverlage/Schroedel.         |
| 46  | F-86    | Vogel, Gerd-Heinz (Hrsg.) (1986): Formel 7. Mathematik für Hauptschulen. Bearbeitet von Josef Benker u. a. Bamberg/Stuttgart: C. C. Buchner/Klett.                                                                 |
| 47  | F-97    | Vogel, Gerd-Heinz/Vollath Engelbert (Hrsg.) (1997): Formel 7. Mathematik für die Hauptschule. Bearbeitet von Karl-Heinz Badenberg u. a. Bamberg: C. C. Buchner.                                                    |
| 48  | F-04    | Sailer, Walter/Vollath, Engelbert/Weidner, Simon (Hrsg.) (2004): For-                                                                                                                                              |

| Nr. | Kürzel      | Titel                                                                                                                                                         |
|-----|-------------|---------------------------------------------------------------------------------------------------------------------------------------------------------------|
|     |             | mel 7. Mathematik für Hauptschulen einschließlich Mittlere-Reife-Zug. Bearbeitet von Karl Haubner u. a. Bamberg: C. C. Buchner.                               |
| 49  | F-11        | Sailer, Walter/Vollath, Engelbert/Weidner, Simon (Hrsg.) (2011): Formel 7. Mathematik. Bearbeitet von Kurt Breu u. a. Bamberg: C. C. Buchner.                 |
| 50  | SW-B-78     | Schmitt, Hans/Wohlfarth, Peter (Hrsg.) (1978): Schmitt Wohlfarth – Mathematik Buch 7. Ausgabe A/B. Bearbeitet von Alois Brandl u. a. München: bsv.            |
| 51  | SW-N-80     | Schmitt, Hans/Wohlfarth, Peter (Hrsg.) (1980): Schmitt Wohlfarth – Mathematik Buch 7. Ausgabe N. Bearbeitet von Heinz Baumann und Hans Schmitt. München: bsv. |
| 52  | SW-B-86     | Brandl, Alois u. a. (1986): Schmitt Wohlfarth – Mathematik Buch 7. Neubearbeitung. München: bsv.                                                              |
| 53  | MBHS-bsv-97 | Brandl, Alois/Gernhardt, Günter/Hartmann, Klaus/Kuhlmay, Egbert (1997): Mathematik Buch 7. Neuauflage. München: bsv.                                          |
| 54  | A-B-82      | Titze, Helmut/Walter, Harald/Feuerlein, Rainer (1982): Algebra 1. Ein Lehr- und Arbeitsbuch. München: bsv.                                                    |
| 55  | A-B-86      | Feuerlein, Rainer/Titze, Helmut/Walter, Harald (1986): Mathematik 7. Algebra. München: bsv.                                                                   |
| 56  | A-B-92      | Feuerlein, Rainer/Titze, Helmut/Walter, Harald (1992): Mathematik 7. Algebra. München: bsv.                                                                   |

#### **Sprachlehre/Sprachbetrachtung/Deutsch**

|    |        |                                                                                                                                                                                                                                                                       |
|----|--------|-----------------------------------------------------------------------------------------------------------------------------------------------------------------------------------------------------------------------------------------------------------------------|
| 57 | SÜ-10  | Knörlein, Josef ( <sup>43</sup> 1910): Sprachübungen für die Volkshauptschule. 2. Heft für das 6. u. 7. Schuljahr. München: R. Oldenbourg.                                                                                                                            |
| 58 | MS-13  | Grillenberger, Georg/Wirth, Georg ( <sup>25</sup> 1913): Lehr- und Übungsstoff für den Unterricht in der Muttersprache. Für die Hand der Schüler bearbeitet. Beispiel – Regel – Übung. A. Ausgabe für geteilte Schulen. 6. Heft (7. Schuljahr). Fürth: A. Schmittner. |
| 59 | SFÜ-28 | Guthmann, Johannes/Plecher, Hans (1928): Sprachformübungen für die Oberstufe der Volkshauptschulen Bayerns. Nach Knörleins „Sprachübungen“ bearbeitet. München: R. Oldenbourg.                                                                                        |
| 60 | SFÜ-32 | Pfeuffer, Otto (1932): Sprachformübungen für die Oberstufe der Volkshauptschulen Bayerns. München: R. Oldenbourg.                                                                                                                                                     |
| 61 | AB-44  | Belstler, Hans/Abschütz, Albin (1944): Arbeitsbuch für den Unterricht in der deutschen Sprache an Volksschulen – Bayern. 4. Teil: 7. und 8. Schuljahr. München u. a.: Max Kellerer's Verlag/Michael Beckstein Verlag/Friedrich Korn'sche Buchhandlung Nürnberg.       |
| 62 | SB-48  | Rottner, Christoph (1948): Sprachbuch für die Volksschulen Bayerns. Teil IV: 7. und 8. Schuljahr. München: Leibniz Verlag/Ehrenwirth/Kösel.                                                                                                                           |
| 63 | SB-54  | Rottner, Christoph/Zwißler, Joseph (1954): Deutsches Sprachbuch für                                                                                                                                                                                                   |

| Nr. | Kürzel   | Titel                                                                                                                                                                                                                                                                                             |
|-----|----------|---------------------------------------------------------------------------------------------------------------------------------------------------------------------------------------------------------------------------------------------------------------------------------------------------|
|     |          | die Volksschule. Teil IV: 7. und 8. Schuljahr. München: Ehrenwirth/Kösel/Oldenbourg.                                                                                                                                                                                                              |
| 64  | MSB-N-69 | Holm, Otto/Steinert, Martha/Henze, Walter/Sawallisch, Hans J. (Hrsg.) (1969): Mein Sprachbuch für Nordrhein-Westfalen. Wege zur Selbsttätigkeit und Differenzierung im muttersprachlichen Unterricht. Bearbeitet von W. Buch und W. Ostermann. Siebentes Schuljahr. Dortmund/Hannover: Schroedel. |
| 65  | MSB-B-72 | Schlagbauer, Albert (Hrsg.) (1972): Mein Sprachbuch für Bayern. Wege zur Selbsttätigkeit und Differenzierung. Überarbeitete Ausgabe in Einzelbänden für die Hauptschule. 7. Jahrgangsstufe. Bearbeitet von Richard Clemens und Wilhelm Eyselein. Hannover/Bad Heilbrunn: Schroedel/Klinkhardt.    |
| 66  | MSB-N-76 | Braun, Werner/Bull, Reimer/Sawallisch, Hans J. (Hrsg.) (1976): Mein neues Sprachbuch. 7. Schuljahr. Bearbeitet von Hartmut Hacker u. a. Hannover: Schroedel.                                                                                                                                      |
| 67  | MSB-B-77 | Schlagbauer, Albert (Hrsg.) (1977): Mein Sprachbuch – neu. Bayern. 7. Jahrgangsstufe. Bearbeitet von Horst Eberhardt u. a. Hannover: Schroedel.                                                                                                                                                   |
| 68  | SW-87    | Ader, Dorothea/Bünting, Karl-Dieter (1987): Sprachwege. Sprachbuch für die Hauptschule. 7. Schuljahr. Hannover: Schroedel.                                                                                                                                                                        |
| 69  | MS-86    | Giehrl, Hans E./Sauter, Helmut (Hrsg.) (1986): Muttersprache. Schülerarbeitsbuch für den Deutschunterricht in der 7. Jahrgangsstufe. Erarbeitet von Ortwin Beisbart u. a. Donauwörth: Auer Verlag.                                                                                                |
| 70  | LeSp-71  | Schorer, Hans/Wiechmann, Albert/Reiss, Hubert (Hrsg.) (?1971): Lebendige Sprache. Sprachbuch für die Hauptschule. 7. Schuljahr. Neubearbeitung von Karlheinz Daniels u. a. Frankfurt/München: Diesterweg.                                                                                         |
| 71  | VG-75    | Hirschenauer, Rupert (Hrsg.) (?1975): Hirschenauer Verstehen und Gestalten. Deutsches Sprachbuch für Gymnasien. Dritter Band: 7. Schuljahr. Bearbeitet von Hermann Kessler. München: Oldenbourg.                                                                                                  |
| 72  | VG-B-80  | Schoebe, Gerhard (Hrsg.) (1980): Verstehen und Gestalten. Deutsches Sprachbuch. Band 3 (7. Schuljahr). Neufassung. Bearbeitet von Heinz Birner u. a. München: Oldenbourg.                                                                                                                         |
| 73  | VG-B-85  | Schoebe, Gerhard (Hrsg.) (?1985): Verstehen und Gestalten. Deutsches Sprachbuch (Ausgabe B). Band 3 (7. Schuljahr). Neufassung [mit Grammatik-Anhang]. Bearbeitet von Heinz Birner u. a. München: Oldenbourg.                                                                                     |
| 74  | VG-N-84  | Schoebe, Gerhard (Hrsg.) (1984): Verstehen und Gestalten. Deutsches Sprachbuch für Gymnasien (Ausgabe N). Band 3 (7. Schuljahr). Neufassung [mit Grammatik-Anhang]. Bearbeitet von Reinhard Meurer u. a. München: Oldenbourg.                                                                     |

| Nr. | Kürzel   | Titel                                                                                                                                                                                                                                                    |
|-----|----------|----------------------------------------------------------------------------------------------------------------------------------------------------------------------------------------------------------------------------------------------------------|
| 75  | VG-B-94  | Mayer, Dieter/Schoebe, Gerhard (Hrsg.) (1994): Verstehen und Gestalten. Sprachbuch für Gymnasien. Ausgabe B, Band 7 (7. Jahrgangsstufe). Bearbeitet von Stephan Fritz u. a. München: Oldenbourg.                                                         |
| 76  | VG-B-97  | Mayer, Dieter/Schoebe, Gerhard (Hrsg.) (21997): Verstehen und Gestalten. Arbeitsbuch für Gymnasien. Ausgabe B, Band 7 (7. Jahrgangsstufe). Bearbeitet von Stephan Fritz u. a. 2., die Rechtschreibreform berücksichtigende Ausgabe. München: Oldenbourg. |
| 77  | VG-E-96  | Notzon, Konrad (Hrsg.) (1996): Verstehen und Gestalten. Arbeitsbuch für Gymnasien. Ausgabe E, Band 7 (7. Schuljahr). Bearbeitet von Wolfgang Berger u. a. Mit neuer Rechtschreibung. München: Oldenbourg.                                                |
| 78  | VG-F-05  | Notzon, Konrad (Hrsg.) (2005): Verstehen und Gestalten. Arbeitsbuch für Gymnasien. Ausgabe F, 7. Schuljahr. Bearbeitet von Arthur Bartle u. a. München: Oldenbourg.                                                                                      |
| 79  | VG-H-06  | Notzon, Konrad (Hrsg.) (22006): Verstehen und Gestalten. Arbeitsbuch für Gymnasien. Ausgabe H, 7. Schuljahr. Bearbeitet von Arthur Bartle u. a. München: Oldenbourg.                                                                                     |
| 80  | MiSp-86  | Hahn, Manfred u. a. (1986): Miteinander sprechen 7. Sprachbuch für bayerische Hauptschulen. Braunschweig: Westermann.                                                                                                                                    |
| 81  | MeW-97   | Batzner, Ansgar u. a. (1997): Mit eigenen Worten 7. Hauptschule Bayern. Braunschweig: Westermann.                                                                                                                                                        |
| 82  | MeW-04   | Böttger, Heiner u. a. (2004): Mit eigenen Worten 7. Hauptschule Bayern. Braunschweig: Westermann.                                                                                                                                                        |
| 83  | HSB-01   | Bildl, Gertraud u. a. (2001): Das Hirschgraben Sprachbuch. Realschule Bayern. 7. Schuljahr. Berlin: Cornelsen.                                                                                                                                           |
| 84  | DK-13    | Bentin, Werner/Krull, Renate (Hrsg.) (2013): Doppel-Klick 7. Das Sprach- und Lesebuch. Grundaussage Nordrhein-Westfalen. Bearbeitet von Ulrich Deters u. a. Berlin: Cornelsen.                                                                           |
| 85  | DB-B-13  | Matthiessen, Wilhelm/Schurf, Bernd/Zirbs, Wieland (Hrsg.) (22013): Deutschbuch 7. Sprach- und Lesebuch. Gymnasium Bayern. Bearbeitet von Johann Anetzberger u. a. Berlin: Cornelsen.                                                                     |
| 86  | DB-N-13  | Schurf, Bernd/Wagner, Andrea (Hrsg.) (2013): Deutschbuch 7. Sprach- und Lesebuch. Gymnasium Nordrhein-Westfalen. Bearbeitet von Gerd Brenner u. a. Berlin: Cornelsen.                                                                                    |
| 87  | W&C-05   | Hensel, Andreas u. a. (2005): Wort & Co 7. Sprachbuch für Gymnasien neu. Bamberg: C. C. Buchner.                                                                                                                                                         |
| 88  | KBD-B-10 | Müller, Karla/Gaiser, Gottlieb (Hrsg.) (2010): Kombi-Buch Deutsch 7. Lese- und Sprachbuch für Gymnasien. Neue Ausgabe Bayern. Bearbeitet von Kerstin Dambach u. a. Bamberg: C. C. Buchner.                                                               |



## ANHANG 3–2: Die Skalen und Kategorien im Überblick

### Datenextraktion

|                                         |          |
|-----------------------------------------|----------|
| Textbeleg                               | <aaaa>   |
| Integrierte Personenreferenzform (iPRF) | 1 = iPRF |
| Berühmte Person (bP)                    | 1 = bP   |

### Meta-Daten

|                         |                                                                                                                                                                                                                                                                                             |
|-------------------------|---------------------------------------------------------------------------------------------------------------------------------------------------------------------------------------------------------------------------------------------------------------------------------------------|
| Fach                    | m = Rechen-/Mathematikbuch<br>s = Sprachbuch Deutsch                                                                                                                                                                                                                                        |
| Schulart (Schule)       | 1 = Volks-, Haupt-, Mittelschule<br>2 = Realschule<br>3 = Gymnasium<br>4 = Gesamtschule, Sekundarschule                                                                                                                                                                                     |
| Land/Region             | 1 = Bayern<br>2 = Nordrhein-Westfalen<br>3 = Sonstige                                                                                                                                                                                                                                       |
| Titel                   | <Sigle>                                                                                                                                                                                                                                                                                     |
| Verlag                  | 1 = bsv [Bayerischer Schulbuch-Verlag]<br>2 = Bucher [F. X. Bucher]<br>3 = Buchner [C. C. Buchner]<br>4 = Cornelsen<br>5 = Ehrenwirth<br>6 = Klett<br>7 = Korn'sche [Friedrich Korn'sche Bhd.]<br>8 = Kösel<br>9 = Oldenbourg/Leibniz<br>10 = Schroedel<br>11 = Westermann<br>12 = Sonstige |
| Erscheinungsjahr (Jahr) | <XXXX>                                                                                                                                                                                                                                                                                      |
| Zeitabschnitt (Zeit)    | 1 = Kaiserzeit<br>2 = Weimarer Zeit<br>3a = NS 1: 1933–1939                                                                                                                                                                                                                                 |

|                                  |                      |
|----------------------------------|----------------------|
|                                  | 3b = NS 2: 1940–1945 |
|                                  | 4 = Nachkriegszeit   |
|                                  | 5 = Ära Adenauer     |
|                                  | 6 = 1963–1972        |
|                                  | 7 = 1973–1981        |
|                                  | 8 = 1982–1985        |
|                                  | 9 = 1986–1990        |
|                                  | 10 = 1991–1999       |
|                                  | 11 = 2000–2010       |
|                                  | 12 = 2011–2013       |
| Zulassung bis (Zul. b.)          | <XXXX>               |
| Seite                            | <XXX>                |
| Partial- oder Totalanalyse (P/T) | 1 = Partialanalyse   |
|                                  | 2 = Totalanalyse     |

### Erhebungskategorien zu Personenreferenzformen

PERSONENREFERENZFORM (PRF) <aa>

#### SKALA WORTART

Substantiv (SUB) 1 = Substantiv

Pronomen (PRO) 1 = Pronomen

Komplexe koordinierte Phrase (kkP) 1 = kkP

#### SKALA PRAGMA-GRAMMATIK

Numerus (NUM) 1 = Singular

2 = Plural

Genus (GEN) 1 = Femininum

2 = Maskulinum

3 = Neutrum

Geschlechtsreferenz (G-REF) 1 = geschlechtsspezifisierend weiblich

2 = geschlechtsspezifisierend männlich

3 = geschlechtsübergreifend

4 = uneindeutig (1/2 oder 3)

#### SKALA LEXIKALISCHE MORPHOLOGIE

Derivation (Deriv.) 1 = Derivation

|                                               |      |                              |
|-----------------------------------------------|------|------------------------------|
| Komposition (Komp.)                           | 1    | = Komposition                |
| Konversion (Konv.)                            | 1    | = Konversion                 |
| SKALA GESCHLECHTSNEUTRALE FORMEN              |      |                              |
| Epikoinon (EPI)                               | 1    | = Epikoinon                  |
| Kollektivum (KOLL)                            | 1    | = Kollektivum                |
| Unisex-Name (UNI)                             | 1    | = Unisex-Name                |
| SKALA EIGENNAMEN                              |      |                              |
| Vorname (VN)                                  | 1    | = Vorname                    |
| Nachname (NN)                                 | 1    | = Nachname                   |
| Namenkürzel (NK)                              | 1    | = Namenkürzel                |
| SKALA APPELLATIVA                             |      |                              |
| Berufsbezeichnung                             | 1    | = Berufsbezeichnung          |
| Verwandtschaftsbezeichnung                    | 1    | = Verwandtschaftsbezeichnung |
| Gesellschaftsbezeichnung                      | 1    | = Gesellschaftsbezeichnung   |
| Appellativum als Eigenname                    | 1    | = Appellativum als Eigenname |
| Erhebungskategorien auf propositionaler Ebene |      |                              |
| VERB                                          | <aa> |                              |
| SKALA FORM DER PRÄDIKATION                    |      |                              |
| Prädikativ                                    | 1    | = Prädikativ                 |
| Apposition                                    | 1    | = Apposition                 |
| Attribuierung                                 | 1    | = Attribuierung              |
| Nominalisierung                               | 1    | = Nominalisierung            |
| SKALA CHARAKTERISIERUNG                       |      |                              |
| Charakterisierungsbeleg                       | <aa> |                              |
| Adverbial                                     | <aa> |                              |
| SKALA MODALITÄT                               |      |                              |
| Objektive Modalität                           | <aa> |                              |
| Negation                                      | <aa> |                              |
| Modalitätsmarker                              | <aa> |                              |

## SKALA SEMANTIK

|                    |    |                                  |
|--------------------|----|----------------------------------|
| Semantische Klasse | 1  | = Zustands-/Eigenschaftsverb     |
|                    | 2  | = Vorgangsverb                   |
|                    | 3  | = Handlungsverb                  |
| Semantische Rolle  | 1  | = Agens                          |
|                    | 2  | = Experiens                      |
|                    | 3  | = Patiens                        |
|                    | 4  | = RezipientIn                    |
|                    | 5  | = Comitativ                      |
|                    | 6  | = Affiziertes Objekt             |
|                    | 7  | = Zustands-/EigenschaftsträgerIn |
|                    | 8  | = Causativ                       |
|                    | 9  | = Possessiv                      |
|                    | 10 | = PossessorIn                    |

|            |   |                      |
|------------|---|----------------------|
| PASSIVITÄT | 1 | = Passivkonstruktion |
|------------|---|----------------------|

## SKALA RELATIONIERTE EINHEITEN

|                                          |      |
|------------------------------------------|------|
| Relationierte Einheit 1 (rE 1)           | <aa> |
| Relationierte Einheit 2 (rE 2)           | <aa> |
| Relationierte Einheit modal (rE modal)   | <aa> |
| Relationierte Einheit kausal (rE kausal) | <aa> |
| Relationierte Einheit lokal (rE lokal)   | <aa> |

**Weitere Kodierungsmöglichkeiten unter allen Kategorien**

|                                                |      |
|------------------------------------------------|------|
| keine Angabe bzw. nicht anwendbar              | = 0  |
| keine passende Kodierungsmöglichkeit verfügbar | = 99 |

ANHANG 4–1: Datengrundlage der wortorientierten Analyse

Verteilung der PRF auf die Geschlechtsreferenzen nach Zeitabschnitten (abs. Zahlen)

|                        | Kaiser      | Weimar      | NS-Zeit     | Nach-<br>krieg | Adenauer    | 1963–<br>1972 | 1973–<br>1981 | 1982–<br>1985 | 1986–<br>1990 | 1991–<br>1999 | 2000–<br>2010 | 2011–<br>2013 |
|------------------------|-------------|-------------|-------------|----------------|-------------|---------------|---------------|---------------|---------------|---------------|---------------|---------------|
| wPRF                   | 165         | 292         | 101         | 73             | 290         | 646           | 286           | 82            | 676           | 638           | 1008          | 603           |
| mPRF                   | 471         | 1118        | 468         | 318            | 773         | 1665          | 919           | 114           | 1002          | 687           | 1298          | 738           |
| üPRF                   | 376         | 367         | 462         | 130            | 268         | 457           | 344           | 46            | 506           | 528           | 1228          | 546           |
| uneind. PRF            | 892         | 772         | 263         | 213            | 435         | 588           | 273           | 32            | 253           | 149           | 289           | 130           |
| davon wahrsch.<br>mPRF | 821         | 684         | 163         | 188            | 377         | 469           | 178           | 28            | 138           | 69            | 90            | 38            |
| davon wahrsch.<br>üPRF | 71          | 88          | 100         | 25             | 58          | 119           | 95            | 4             | 115           | 80            | 199           | 92            |
| nicht zuzuordnen       | 8           | 60          | 85          | 18             | 36          | 70            | 30            | 1             | 45            | 46            | 32            | 26            |
| <b>PRF gesamt</b>      | <b>1912</b> | <b>2609</b> | <b>1379</b> | <b>752</b>     | <b>1802</b> | <b>3426</b>   | <b>1852</b>   | <b>275</b>    | <b>2482</b>   | <b>2048</b>   | <b>3855</b>   | <b>2043</b>   |

ANHANG 4–2: Datengrundlage der propositionsorientierten Analyse

| Propositionen mit weiblichen oder männlichen ReferentInnen nach Zeitabschnitten |             |             |            |                |             |               |               |               |               |               |               |               |
|---------------------------------------------------------------------------------|-------------|-------------|------------|----------------|-------------|---------------|---------------|---------------|---------------|---------------|---------------|---------------|
|                                                                                 | Kaiser      | Weimar      | NS-Zeit    | Nach-<br>krieg | Adenauer    | 1963–<br>1972 | 1973–<br>1981 | 1982–<br>1985 | 1986–<br>1990 | 1991–<br>1999 | 2000–<br>2010 | 2011–<br>2013 |
| Propositionen<br>mit wPRF                                                       | 165         | 292         | 101        | 73             | 290         | 646           | 286           | 82            | 676           | 638           | 1008          | 603           |
| Propositionen<br>mit eind. mPRF                                                 | 471         | 1118        | 468        | 318            | 773         | 1665          | 919           | 114           | 1002          | 687           | 1298          | 738           |
| Propositionen<br>mit uneind. mPRF                                               | 821         | 684         | 163        | 188            | 377         | 469           | 178           | 28            | 138           | 69            | 90            | 38            |
| <b>Propositionen<br/>gesamt</b>                                                 | <b>1457</b> | <b>2094</b> | <b>732</b> | <b>579</b>     | <b>1440</b> | <b>2780</b>   | <b>1383</b>   | <b>224</b>    | <b>1816</b>   | <b>1394</b>   | <b>2396</b>   | <b>1379</b>   |

**ANHANG 5–1: Bestimmungen zur Umsetzung des Gleichberechtigungsgrundsatzes in Schulbüchern (alphabetisch nach Bundesländern)**

| Bundesland        | Regelung                                                                                                                                                                                                                                                                                                                                                                                                                                                                                                                                                                                                                                                                                                                                                                                                                                                                                                                                                                                                                                                                                                                                                                                                                                                                                                                                                         | Rekonstruierte Vorstufen<br>(ohne Schulgesetze)                                                                                                                                                                                                                                                                                                                                                                       |
|-------------------|------------------------------------------------------------------------------------------------------------------------------------------------------------------------------------------------------------------------------------------------------------------------------------------------------------------------------------------------------------------------------------------------------------------------------------------------------------------------------------------------------------------------------------------------------------------------------------------------------------------------------------------------------------------------------------------------------------------------------------------------------------------------------------------------------------------------------------------------------------------------------------------------------------------------------------------------------------------------------------------------------------------------------------------------------------------------------------------------------------------------------------------------------------------------------------------------------------------------------------------------------------------------------------------------------------------------------------------------------------------|-----------------------------------------------------------------------------------------------------------------------------------------------------------------------------------------------------------------------------------------------------------------------------------------------------------------------------------------------------------------------------------------------------------------------|
| Baden-Württemberg | <p><b>Allgemeine Zulassungsvoraussetzungen:</b></p> <p>„Schulbücher können insbesondere nicht zugelassen werden, wenn sie die für die freiheitlichdemokratische Grundordnung geltenden Grundrechte, wie z. B. [...] die Gleichberechtigung von Mann und Frau, [...] oder Grundsätze des Rechtsstaates, namentlich das Gleichheitsgebot verletzen. [...]</p> <p><i>Einschlägige Leitfragen sind:</i> [...]</p> <ul style="list-style-type: none"><li>– Wird im Buch die Umsetzung von Geschlechtergleichheit als durchgängiges Prinzip unterstützt?“ (2011, 4f.)</li></ul> <p><b>Weitere Zulassungsvoraussetzungen:</b></p> <p>„2.3 Altersgemäße und dem Prinzip des ‚Gender Mainstreaming‘ Rechnung tragende Aufbereitung der Inhalte sowie Gestaltung der äußeren Form</p> <p>[...] Das Buch muss ausreichende Identifikationsmöglichkeiten bieten, damit sich sowohl Jungen als auch Mädchen angesprochen fühlen. Leistungen in Wissenschaft, Kunst, Politik, Wirtschaft und Gesellschaft müssen durch Männer und Frauen angemessen repräsentiert werden.</p> <p>Die Bild- und Textauswahl des Buches soll bei den Schülerinnen und Schülern gleichermaßen die Bereitschaft fördern, künftig in Beruf, Familie und Gesellschaft Verantwortung zu übernehmen. Es soll insgesamt deutlich werden, dass diese Bereiche sowohl Männer als auch Frauen angehen.</p> | <p><b>Allgemeine Zulassungsvoraussetzungen:</b></p> <p>„Schulbücher sind in jedem Fall abzulehnen, [...] die die Gleichberechtigung von Mann und Frau [...] verletzen“ (1984, 6)</p> <p><b>Leitfrage zur Beurteilung:</b></p> <p>„Vermeidet das Schulbuch bei der Darstellung von Mann und Frau Rollenklischees?“ (1984, 6)</p> <p>Handreichungen zur Begutachtung von Schulbüchern (Baden-Württemberg) von 1984.</p> |

| Bundesland | Regelung                                                                                                                                                                                                                                                                                                                                                                                                                                                                                                                                                                                                                                                                                                                                                                                                                                                                                                                                | Rekonstruierte Vorstufen (ohne Schulgesetze)                                                                                                                                                                                                                                                                                                                        |
|------------|-----------------------------------------------------------------------------------------------------------------------------------------------------------------------------------------------------------------------------------------------------------------------------------------------------------------------------------------------------------------------------------------------------------------------------------------------------------------------------------------------------------------------------------------------------------------------------------------------------------------------------------------------------------------------------------------------------------------------------------------------------------------------------------------------------------------------------------------------------------------------------------------------------------------------------------------|---------------------------------------------------------------------------------------------------------------------------------------------------------------------------------------------------------------------------------------------------------------------------------------------------------------------------------------------------------------------|
|            | <p><i>Einschlägige Leitfragen hierzu sind: [...]</i></p> <ul style="list-style-type: none"><li>– Bietet das Buch ausreichende Identifikationsmöglichkeiten, dass sich sowohl Jungen als auch Mädchen angesprochen fühlen? Werden Leistungen in Wissenschaft, Kunst, Politik und Gesellschaft durch Männer <i>und</i> Frauen angemessen repräsentiert?</li><li>– Fördert die Bild- und Textauswahl des Buches bei den Schülerinnen und Schülern die Bereitschaft, künftig in Beruf, Familie und Gesellschaft Verantwortung zu übernehmen? Wird insgesamt deutlich, dass alle drei Bereiche Männer <i>und</i> Frauen gleichermaßen angehen? Werden Rollenklischees vermieden?</li><li>– Wirken die Materialauswahl und die Gesamtausstattung des Buches für Mädchen und Jungen gleichermaßen ansprechend?“ (2011, 7)</li></ul> <p>Merkblatt für Schulbuchverlage des Landesinstituts für Schulentwicklung Baden-Württemberg von 2011.</p> |                                                                                                                                                                                                                                                                                                                                                                     |
| Bayern     | <p><b>Allgemeine Zulassungsvoraussetzungen:</b><br/>„Personen und Personengruppen dürfen nicht diskriminierend dargestellt werden.“ (2014, 8)</p> <p><b>Weitere Zulassungsvoraussetzungen:</b><br/>„2.4.4 Gleichberechtigung<br/>Es ist darauf zu achten, dass Männer und Frauen gleichberechtigt dargestellt sind (vgl. Art. 3 Abs. 1 und 2 GG sowie Art. 118 Abs. 1 und 2 BV). Die Lebenswirklichkeit von Frau-</p>                                                                                                                                                                                                                                                                                                                                                                                                                                                                                                                   | <p>2010:<br/><b>Allgemeine Zulassungsvoraussetzungen:</b><br/>„Personen und Personengruppen dürfen nicht diskriminierend dargestellt werden.“ (2010, 8)</p> <p><b>Weitere Zulassungsvoraussetzungen:</b><br/>„2.4.4 Gleichberechtigung<br/>Es ist darauf zu achten, dass Männer und Frauen gleichberechtigt dargestellt sind (vgl. Art. 3 Abs. 1 und 2 GG sowie</p> |



| Bundesland | Regelung                                                                                                                                                                                                                                                                                                                                                                                                                                                                                                                                   | Rekonstruierte Vorstufen (ohne Schulgesetze)                                                                                                                                                                                                                                                                                                                                                                                                                                                                                              |
|------------|--------------------------------------------------------------------------------------------------------------------------------------------------------------------------------------------------------------------------------------------------------------------------------------------------------------------------------------------------------------------------------------------------------------------------------------------------------------------------------------------------------------------------------------------|-------------------------------------------------------------------------------------------------------------------------------------------------------------------------------------------------------------------------------------------------------------------------------------------------------------------------------------------------------------------------------------------------------------------------------------------------------------------------------------------------------------------------------------------|
|            | en in unserer Gesellschaft sowohl im Hinblick auf Belastungen und Konflikte wie auch hinsichtlich ihrer Teilnahme am Berufsleben und am öffentlichen Leben muss ausreichend dargestellt werden. Das Lernmittel darf nicht der Entwicklung einseitiger Vorstellungen über die Position von Männern und Frauen in Gesellschaft und Familie oder anderen Formen des Zusammenlebens Vorschub leisten.“ (2014, 8f.)<br>Allgemeiner Kriterienkatalog des Bayerischen Staatsministeriums für Bildung und Kultus, Wissenschaft und Kunst von 2014. | Art. 118 Abs. 1 und 2 BV). Die Lebenswirklichkeit von Frauen in unserer Gesellschaft sowohl im Hinblick auf Belastungen und Konflikte wie auch hinsichtlich ihrer Teilnahme am Berufsleben und am öffentlichen Leben muss ausreichend dargestellt werden. Das Lernmittel darf nicht der Entwicklung einseitiger Vorstellungen über die Position von Männern und Frauen in Gesellschaft und Familie Vorschub leisten.“<br>(2010, 9)<br>Allgemeiner Kriterienkatalog des Bayerischen Staatsministeriums für Unterricht und Kultus von 2010. |
|            |                                                                                                                                                                                                                                                                                                                                                                                                                                                                                                                                            | 1987 [1985]:<br><b>Zulassungsvoraussetzungen:</b><br>„Es ist darauf zu achten, daß Männer und Frauen gleichberechtigt dargestellt sind [...] das Lernmittel darf darüber hinaus nicht der Entwicklung einseitiger Vorstellungen über die Position von Männern und Frauen in Gesellschaft und Familie Vorschub leisten.“ (1987 [1985], 21)<br>Katalog allgemeiner Kriterien und Richtlinien für die Begutachtung von Lernmitteln (Bayern) von 1985.                                                                                        |
| Berlin     | <b>Bildungs- und Erziehungsauftrag:</b><br>„Schulische Bildung und Erziehung sollen die Schülerinnen und Schüler insbesondere befähigen, [...] (2) die Gleichstellung von Mann und Frau auch über die Anerkennung der Leistungen der Frauen in Geschichte, Wissenschaft, Wirtschaft, Technik, Kultur und Gesellschaft zu erfahren“ (2010, §3, Abs. 3)<br>SchulG Berlin in der Fassung von 2010.                                                                                                                                            |                                                                                                                                                                                                                                                                                                                                                                                                                                                                                                                                           |

| Bundesland  | Regelung                                                                                                                                                                                                                                                                                                                                                                                                                                                                                                                                                                                                                                                                                                                                                                                                                                                                                                                                                                                                                                                                                                                                                                 | Rekonstruierte Vorstufen (ohne Schulgesetze)                                                                                                                                                                                                                                                                                                                                                                                                                                                                                                                                                                                                          |
|-------------|--------------------------------------------------------------------------------------------------------------------------------------------------------------------------------------------------------------------------------------------------------------------------------------------------------------------------------------------------------------------------------------------------------------------------------------------------------------------------------------------------------------------------------------------------------------------------------------------------------------------------------------------------------------------------------------------------------------------------------------------------------------------------------------------------------------------------------------------------------------------------------------------------------------------------------------------------------------------------------------------------------------------------------------------------------------------------------------------------------------------------------------------------------------------------|-------------------------------------------------------------------------------------------------------------------------------------------------------------------------------------------------------------------------------------------------------------------------------------------------------------------------------------------------------------------------------------------------------------------------------------------------------------------------------------------------------------------------------------------------------------------------------------------------------------------------------------------------------|
| Brandenburg | <p><b>Vorwort:</b></p> <p>„Schließlich ist die Förderung des bewussten Umgangs mit Vielfalt, Heterogenität und Differenz eine zentrale Aufgabe für das Schulbuch“ (2012, 4)</p> <p>Im Schulbuch ist zu beachten:</p> <ul style="list-style-type: none"><li>– „die Gleichschätzung und Gleichbehandlung jedes Menschen, unabhängig von seiner Rasse, Abstammung, Nationalität, Sprache, seines Geschlechts, seiner sexuellen Identität, seiner sozialen Herkunft oder Stellung, seiner Behinderung, seiner religiösen, weltanschaulichen oder politischen Überzeugung,</li><li>– die verbale und tatsächliche Gleichstellung von Frau und Mann“ (2012, 6)</li></ul> <p><b>Zulassungsvoraussetzungen:</b></p> <p>„2 <i>Orientierung an gesellschaftlichen Werten sowie an den Zielen und Grundsätzen von Bildung und Erziehung</i> [...] Werden die Aspekte zum Genderbewusstsein berücksichtigt und die Möglichkeiten zur Jungenförderung beachtet?“ (2012, 7)</p> <p>Orientierungsschwerpunkte für die Begutachtung des Ministeriums für Bildung, Jugend und Sport des Landes Brandenburg und des Landesinstituts für Schule und Medien Berlin-Brandenburg von 2012.</p> | <p><b>Allgemeine Zulassungsvoraussetzungen:</b></p> <p>„1. <i>Orientierung an Rechtsnormen und Werten</i> [...] Wird gegen den Grundsatz der Gleichstellung von Mann und Frau verstoßen?</p> <p>Reproduziert das Unterrichtswerk Rollenklischees (insbesondere die stereotype Zuweisung von ‚typisch männlichen‘ und ‚typisch weiblichen‘ Eigenschaften und Verhaltensweisen, wie z.B.: ‚männliche Aktivität‘ versus ‚weibliche Passivität‘; ‚männlicher Verstand‘ versus ‚weibliches Gefühl‘; ‚männliche Stärke‘ versus ‚weibliche Schwäche‘)?“ (1992, [122])</p> <p>Handreichungen für die Begutachtung von Lernmitteln (Brandenburg) von 1992.</p> |
| Bremen      | <p><b>Allgemeine Zulassungsvoraussetzungen:</b></p> <p>„Allgemeine Prüfkriterien für Schulbücher</p> <p>[...] Folgt das Lernbuch dem Leitprinzip der Geschlechterge-</p>                                                                                                                                                                                                                                                                                                                                                                                                                                                                                                                                                                                                                                                                                                                                                                                                                                                                                                                                                                                                 | <p><b>Zulassungsvoraussetzungen:</b></p> <p>„Schulbücher müssen sich daran messen lassen, ob sie dazu beitragen, Kinder und Jugendliche zu kritischfähigen, selbstän-</p>                                                                                                                                                                                                                                                                                                                                                                                                                                                                             |

| Bundesland | Regelung                                                                                                                                                                                                                                                                                                                                                                                                                                                                                                       | Rekonstruierte Vorstufen (ohne Schulgesetze)                                                                                                                                                                                                                                                                                                                                                                                                                                                                           |
|------------|----------------------------------------------------------------------------------------------------------------------------------------------------------------------------------------------------------------------------------------------------------------------------------------------------------------------------------------------------------------------------------------------------------------------------------------------------------------------------------------------------------------|------------------------------------------------------------------------------------------------------------------------------------------------------------------------------------------------------------------------------------------------------------------------------------------------------------------------------------------------------------------------------------------------------------------------------------------------------------------------------------------------------------------------|
|            | rechtigkeit? Wird ein übergreifendes Rollenverständnis für beide Geschlechter deutlich? Werden vielseitige Vorstellungen über die Position von Frauen und Männern vermittelt?“ (2010, 2)                                                                                                                                                                                                                                                                                                                       | digen und mit den Regeln demokratischer Gesellschaftsformen vertrauten Menschen heranzubilden. In diesem Rahmen sollen sie u. a. die tatsächliche Gleichberechtigung der Geschlechter fördern und auf eine Veränderung der traditionellen Rollen- und Berufsverteilung hinwirken.“ (1984, [122])                                                                                                                                                                                                                       |
|            | Kriterienkatalog Bremen des Landesinstituts für Schule Bremen von 2010/2011.                                                                                                                                                                                                                                                                                                                                                                                                                                   | ZGF Bremen: Richtlinie für die Darstellung von Frau und Mann in den Schulbüchern von 1984.                                                                                                                                                                                                                                                                                                                                                                                                                             |
| Hamburg    | <p><b>Bildungs- und Erziehungsauftrag:</b></p> <p>„Es ist Aufgabe der Schule, die Schülerinnen und Schüler zu befähigen und ihre Bereitschaft zu stärken,</p> <ul style="list-style-type: none"><li>– ihre Beziehungen zu anderen Menschen nach den Grundsätzen der Achtung und Toleranz, der Gerechtigkeit und Solidarität sowie der Gleichberechtigung der Geschlechter zu gestalten und Verantwortung für sich und andere zu übernehmen“ (2014, §2, Abs. 1)</li></ul> <p>HmbSG in der Fassung von 2014.</p> |                                                                                                                                                                                                                                                                                                                                                                                                                                                                                                                        |
| Hessen     | <p><b>Zulassungsvoraussetzungen:</b></p> <p>„Ein Schulbuch oder digitales Lehrwerk ist zuzulassen, wenn es</p> <ol style="list-style-type: none"><li>1. allgemeinen Verfassungsgrundsätzen und Rechtsvorschriften nicht widerspricht, insbesondere die Gebote der Achtung der Menschenwürde und Menschenrechte, des friedlichen Zusammenlebens, der Toleranz sowie das Diskriminierungs- und Indoktrinationsverbot nicht verletzt, kein geschlechts-, behinderten-, religions- oder rassendis-</li></ol>       | <p><b>Zulassungsvoraussetzungen:</b></p> <p>„Reproduziert das Unterrichtswerk Rollenklischees (insbesondere die stereotype Zuweisung von ‚typisch männlichen‘ und ‚typisch weiblichen‘ Eigenschaften und Verhaltensweisen, wie z.B.: ‚männliche Aktivität‘ versus ‚weibliche Passivität‘; ‚männlicher Verstand‘ versus ‚weibliches Gefühl‘; ‚männliche Stärke‘ versus ‚weibliche Schwäche‘)?</p> <p>Nimmt das Werk Identifikationsangebote für Schülerinnen auf, die Mädchen und Frauen nicht auf benachteiligende</p> |

| Bundesland             | Regelung                                                                                                                                                                                                                                                                                                                                                                                                                                                                                                                                                                                                                                                                                       | Rekonstruierte Vorstufen (ohne Schulgesetze)                                                                                                                                                                                                                                                                                                       |
|------------------------|------------------------------------------------------------------------------------------------------------------------------------------------------------------------------------------------------------------------------------------------------------------------------------------------------------------------------------------------------------------------------------------------------------------------------------------------------------------------------------------------------------------------------------------------------------------------------------------------------------------------------------------------------------------------------------------------|----------------------------------------------------------------------------------------------------------------------------------------------------------------------------------------------------------------------------------------------------------------------------------------------------------------------------------------------------|
|                        | kriminierendes Verständnis fördert sowie dem Bildungs- und Erziehungsauftrag nach § 2 des Schulgesetzes nicht widerspricht“ (2013, §3, Abs. 1)<br>Zulassungsverordnung Hessen von 2013.                                                                                                                                                                                                                                                                                                                                                                                                                                                                                                        | Rollen verpflichtet, sondern diese als selbständige, verantwortliche und kreativ-handelnde Personen zeigt?“ (1989, Anlage 1, S. 1)<br>Richtlinien für die Begutachtung von Lehrbüchern des Hessischen Kultusministeriums von 1989.                                                                                                                 |
| Mecklenburg-Vorpommern | <b>Zulassungsvoraussetzungen:</b><br>„Wird die Darstellung der Rolle der Frau in der Gesellschaft unter besonderer Beachtung der Vermeidung von Rollenklischees und Geschlechterdiskriminierung angemessen berücksichtigt? (Gemeint ist hier die Beurteilung der Gleichstellung der Geschlechter anhand der Verwendung von Bildern oder der inhaltlichen Gestaltung von Texten, z. B. die Darstellung von Berufen und die Aufgabenverteilung der Geschlechter, die Rolle von Mann und Frau in der Familie etc.)“ (2001, 3)<br>Verfahren und Kriterien der Schulbuchzulassung des Landesinstituts für Schule und Ausbildung Mecklenburg-Vorpommern von 2001. [vermutlich nicht mehr im Einsatz] |                                                                                                                                                                                                                                                                                                                                                    |
| Niedersachsen          | <b>Allgemeine Zulassungsvoraussetzungen:</b><br>„Entspricht die Darstellung von Männern und Frauen, Jungen und Mädchen dem Verfassungsgebot der Gleichberechtigung? Werden einseitige Rollenzuweisungen vermieden? Wird die Gleichwertigkeit der Aufgaben von Mann und Frau in Familie, Beruf und Gesellschaft deutlich?“ (o. J., 1)                                                                                                                                                                                                                                                                                                                                                           | <b>Allgemeine Zulassungsvoraussetzungen:</b><br>„Entspricht die Darstellung von Männern und Frauen, Jungen und Mädchen dem Verfassungsgebot der Gleichberechtigung? Werden einseitige Rollenzuweisungen vermieden? Wird die Gleichwertigkeit der Aufgaben von Mann und Frau in Familie, Beruf und Gesellschaft deutlich?“ (1986, [Anhang 1, S. 1]) |

| Bundesland | Regelung                                                                                                                                                                                                                                                                                                                                                                                                                                                                                                                                                                                                                                                                                                                                                                                                                                                                                                                                                                                                                                                                                                                                                                                                                                                                                                                                                                                                         | Rekonstruierte Vorstufen (ohne Schulgesetze)                                                                                                                                                                                                                                                                                                                                                                                                                                                                                                                                                                                                                                                                                                                                                                                                                                                                                                                                                                                                                                                                                                                                                                                                                                                                                                                                                    |
|------------|------------------------------------------------------------------------------------------------------------------------------------------------------------------------------------------------------------------------------------------------------------------------------------------------------------------------------------------------------------------------------------------------------------------------------------------------------------------------------------------------------------------------------------------------------------------------------------------------------------------------------------------------------------------------------------------------------------------------------------------------------------------------------------------------------------------------------------------------------------------------------------------------------------------------------------------------------------------------------------------------------------------------------------------------------------------------------------------------------------------------------------------------------------------------------------------------------------------------------------------------------------------------------------------------------------------------------------------------------------------------------------------------------------------|-------------------------------------------------------------------------------------------------------------------------------------------------------------------------------------------------------------------------------------------------------------------------------------------------------------------------------------------------------------------------------------------------------------------------------------------------------------------------------------------------------------------------------------------------------------------------------------------------------------------------------------------------------------------------------------------------------------------------------------------------------------------------------------------------------------------------------------------------------------------------------------------------------------------------------------------------------------------------------------------------------------------------------------------------------------------------------------------------------------------------------------------------------------------------------------------------------------------------------------------------------------------------------------------------------------------------------------------------------------------------------------------------|
|            | <p><b>Weitere Zulassungsvoraussetzungen:</b></p> <ul style="list-style-type: none"> <li>– „Im Einzelnen ist darauf zu achten, dass deutlich wird, dass Frauen die gleichen Möglichkeiten und Chancen im privaten, beruflichen und öffentlichen Leben haben bzw. haben sollen wie Männer;</li> <li>– Mädchen und Frauen nicht Fähigkeiten und Verhaltensweisen wie Intelligenz, Durchsetzungsvermögen und Kreativität abgesprochen werden, die sie befähigen, Leistungen zu erbringen, die denen von Jungen und Männern gleich bzw. gleichwertig sind;</li> <li>– von Frauen erbrachte Leistungen anerkannt und ggf. (z. B. in Literatur und Geschichte) angemessen berücksichtigt werden;</li> <li>– die Wahrnehmung der Aufgaben in Haus und Familie als vielseitige und anspruchsvolle, einer beruflichen Tätigkeit gleichwertige (oft sogar überlegene) Fähigkeit gewürdigt wird;</li> <li>– deutlich wird, dass Mann und Frau gemeinsam und in gleichem Maße für die Familie verantwortlich sind;</li> <li>– im häuslichen und familiären Bereich eine partnerschaftliche Aufgabenteilung erkennbar wird;</li> <li>– auch in Beruf und öffentlichem Leben tätige Frauen in Erscheinung treten;</li> <li>– Berufstätigkeit der Frau nicht nur auf finanzielle Notwendigkeit zurückgeführt wird, sondern erkennbar wird, dass sie auch dem Bedürfnis nach beruflicher Bestätigung entsprechen kann;</li> </ul> | <p><b>Weitere Zulassungsvoraussetzungen:</b></p> <ul style="list-style-type: none"> <li>– „Im Einzelnen ist darauf zu achten, daß deutlich wird, daß Frauen die gleichen Möglichkeiten und Chancen im privaten, beruflichen und öffentlichen Leben haben bzw. haben sollen wie Männer;</li> <li>– Mädchen und Frauen nicht Fähigkeiten und Verhaltensweisen wie Intelligenz, Durchsetzungsvermögen und Kreativität abgesprochen werden, die sie befähigen, Leistungen zu erbringen, die denen von Jungen und Männern gleich bzw. gleichwertig sind;</li> <li>– von Frauen erbrachte Leistungen anerkannt und ggf. (z. B. in Literatur und Geschichte) angemessen berücksichtigt werden;</li> <li>– die Wahrnehmung der Aufgaben in Haus und Familie als vielseitige und anspruchsvolle, einer beruflichen Tätigkeit gleichwertige (oft sogar überlegene) Fähigkeit gewürdigt wird;</li> <li>– deutlich wird, daß Mann und Frau in der Familie gemeinsam und in gleichem Maße Verantwortung haben;</li> <li>– im häuslichen und familiären Bereich eine partnerschaftliche Aufgabenteilung erkennbar wird;</li> <li>– Berufstätigkeit der Frau nicht nur auf finanzielle Notwendigkeit zurückgeführt wird, sondern erkennbar wird, daß sie auch dem Bedürfnis nach beruflicher Bestätigung entsprechen kann;</li> <li>– Frauen u. a. auch in leitenden Funktionen dargestellt werden;</li> </ul> |

| Bundesland          | Regelung                                                                                                                                                                                                                                                                                                                                                                                                                                                                                                                                                                                 | Rekonstruierte Vorstufen (ohne Schulgesetze)                                                                                                                                                                                                                                                                                                                                                                                                                                                                                                                                                                                                                                                                                                                                                                                                                                     |
|---------------------|------------------------------------------------------------------------------------------------------------------------------------------------------------------------------------------------------------------------------------------------------------------------------------------------------------------------------------------------------------------------------------------------------------------------------------------------------------------------------------------------------------------------------------------------------------------------------------------|----------------------------------------------------------------------------------------------------------------------------------------------------------------------------------------------------------------------------------------------------------------------------------------------------------------------------------------------------------------------------------------------------------------------------------------------------------------------------------------------------------------------------------------------------------------------------------------------------------------------------------------------------------------------------------------------------------------------------------------------------------------------------------------------------------------------------------------------------------------------------------|
|                     | <ul style="list-style-type: none"><li>– Frauen u. a. auch in leitenden Funktionen dargestellt werden;</li><li>– für Frauen ebenso wie für Männer ein möglichst breites Berufsspektrum, das auch naturwissenschaftlich-technische Berufe einbezieht, vorgestellt wird;</li><li>– durch die Auswahl der Themen, Texte, Abbildungen und Aufgabenstellungen sich Mädchen ebenso wie Jungen angesprochen fühlen können, so weit dies vom behandelten Zusammenhang her möglich ist.“ (o. J., 5f.)</li></ul> <p>Kriterienkatalog für die Beurteilung von Schulbüchern (Niedersachsen) o. J.</p> | <ul style="list-style-type: none"><li>– für Frauen ebenso wie für Männer ein möglichst breites Berufsspektrum, das auch naturwissenschaftlich-technische Berufe einbezieht, vorgestellt wird;</li><li>– auch in Beruf und öffentlichem Leben tätige Frauen in Erscheinung treten;</li><li>– durch die Auswahl der Themen, Texte, Abbildungen und Aufgabenstellungen sich Mädchen ebenso wie Jungen angesprochen fühlen können, so weit dies vom behandelten Zusammenhang her möglich ist.“ (1986, [Anhang 1, S. 1])</li></ul> <p>Kriterienkatalog für die Beurteilung von Schulbüchern (Niedersachsen) von 1986.</p>                                                                                                                                                                                                                                                             |
| Nordrhein-Westfalen | <p><b>Allgemeine Zulassungsvoraussetzungen:</b></p> <ul style="list-style-type: none"><li>– „Das Lernmittel fördert ein diskriminierendes Verständnis nicht.</li><li>– Der Grundsatz der Gleichbehandlung von Mann und Frau wird eingehalten (keine Rollenklischees).</li><li>– In den Lernangeboten werden geschlechtsspezifische Interessen von Jungen und Mädchen angemessen berücksichtigt.“ ([2015], Nr. 21-23)</li></ul> <p>Lernmittelbegutachtung des Ministeriums für Schule und Weiterbildung des Landes Nordrhein-Westfalen [2015].</p>                                        | <p>1991:</p> <p><b>Allgemeine Zulassungsvoraussetzungen:</b></p> <p>„5.2 Berücksichtigung des Grundsatzes der Gleichstellung von Frau und Mann</p> <p><i>Leitfragen:</i></p> <ul style="list-style-type: none"><li>– Reproduziert das Unterrichtswerk Rollenklischees (insbesondere stereotype Zuweisung von ‚typisch männlichen‘ und ‚typisch weiblichen‘ Eigenschaften und Verhaltensweisen, wie z.B.: ‚männliche Aktivität‘ versus ‚weibliche Passivität‘, ‚männlicher Verstand‘ versus ‚weibliches Gefühl‘, ‚männliche Stärke‘ versus ‚weibliche Schwäche‘)?</li><li>– Nimmt das Werk Identifikationsangebote für Schülerinnen auf, die Mädchen und Frauen nicht einseitig auf traditionelle sowie benachteiligende Rollen in Familie, Beruf und Gesellschaft verpflichten, sondern diese als selbständige, verantwortliche und kreativ handelnde Personen zeigen?</li></ul> |

| Bundesland | Regelung | Rekonstruierte Vorstufen (ohne Schulgesetze)                                                                                                                                                                                                                                                                                                                                                                                                                                                                                                                                                                                                                                                                                                                                                                                                                                                                                                                                                                                                                                                                                                                                                        |
|------------|----------|-----------------------------------------------------------------------------------------------------------------------------------------------------------------------------------------------------------------------------------------------------------------------------------------------------------------------------------------------------------------------------------------------------------------------------------------------------------------------------------------------------------------------------------------------------------------------------------------------------------------------------------------------------------------------------------------------------------------------------------------------------------------------------------------------------------------------------------------------------------------------------------------------------------------------------------------------------------------------------------------------------------------------------------------------------------------------------------------------------------------------------------------------------------------------------------------------------|
|            |          | <ul style="list-style-type: none"> <li>– Nimmt das Unterrichtswerk Identifikationsangebote für Schüler auf, die zur Auseinandersetzung mit der Männerrolle in unserer Gesellschaft anregen?“ (1991, [24f.])<br/>Lernmitteltenehmungserlass Nordrhein-Westfalen von 1991.</li> </ul>                                                                                                                                                                                                                                                                                                                                                                                                                                                                                                                                                                                                                                                                                                                                                                                                                                                                                                                 |
|            |          | <p>1985:</p> <p><b>Erläss zur Berücksichtigung frauenspezifischer Belange:</b></p> <p>„Bei der Erstellung, Fortschreibung und Überarbeitung von Richtlinien und Lehrplänen ist zu beachten, dass</p> <ul style="list-style-type: none"> <li>– Selbstverwirklichung in sozialer Verantwortung für Mädchen und Jungen gleichermaßen erreichbar wird,</li> <li>– im Unterricht die Lebensbedingungen von Mädchen und Jungen, Frauen und Männern thematisiert werden und auf die notwendige Veränderung überkommenen Rollenverhaltens hingewirkt wird, um eine gleichgewichtige Bedeutung von Frauen und Männern in Familie, Beruf und Gesellschaft zu erreichen,</li> <li>– den Mädchen ein breites Spektrum an Berufswahlmöglichkeiten eröffnet und ihre Bereitschaft zur Berufstätigkeit und Übernahme leitender beruflicher Funktionen entwickelt wird,</li> <li>– entsprechend die Bereitschaft von Jungen geweckt wird, neue Schwerpunkte in ihrer Lebens- und Berufsplanung zugunsten einer Doppelorientierung im Hinblick auf Familien- und Erwerbsarbeit zu setzen,</li> <li>– das Interesse von Mädchen an Naturwissenschaft und Technik systematisch geweckt und gefördert werden</li> </ul> |

| Bundesland      | Regelung                                                                                                                                                                                                                                                                                                                                                                                                                                                                                                                                                                                                             | Rekonstruierte Vorstufen (ohne Schulgesetze)                                                                                                                                                                                                                                                                                                                                                                                                                                                                                                                    |
|-----------------|----------------------------------------------------------------------------------------------------------------------------------------------------------------------------------------------------------------------------------------------------------------------------------------------------------------------------------------------------------------------------------------------------------------------------------------------------------------------------------------------------------------------------------------------------------------------------------------------------------------------|-----------------------------------------------------------------------------------------------------------------------------------------------------------------------------------------------------------------------------------------------------------------------------------------------------------------------------------------------------------------------------------------------------------------------------------------------------------------------------------------------------------------------------------------------------------------|
|                 |                                                                                                                                                                                                                                                                                                                                                                                                                                                                                                                                                                                                                      | <p>kann,</p> <ul style="list-style-type: none"><li>– in den sprachlichen Formulierungen von Richtlinien und Lehrplänen deutlich wird, dass der Unterricht gleichermaßen Schülerinnen wie Schüler erreichen soll,</li><li>– die entsprechenden Vorgaben für die Gestaltung von Schulbüchern aus den Richtlinien und Lehrplänen direkt abzuleiten sind.“ (1985, [36])</li></ul> <p>Berücksichtigung frauenspezifischer Belange in den Richtlinien und Lehrplänen für die Schulen im Lande Nordrhein-Westfalen, Rundschreiben des Kultusministeriums von 1985.</p> |
| Rheinland-Pfalz | <p><b>Allgemeine Zulassungsvoraussetzungen:</b></p> <p>„4.1.1.2 Die Prüfung soll insbesondere feststellen, ob ein Schulbuch [...]</p> <ul style="list-style-type: none"><li>– dem Ziel einer gleichwertigen und partnerschaftlichen Lebensgestaltung von Mädchen und Jungen entspricht und</li><li>– zeitgemäße und ausreichende Identifikationsangebote für Mädchen und Jungen im beruflichen und privaten Bereich enthält.“ (1993, 438)</li></ul> <p>Genehmigung, Einführung und Verwendung von Lehr- und Lernmitteln, Verwaltungsvorschrift des Ministeriums für Bildung und Kultur Rheinland-Pfalz von 1993.</p> | <p><b>Allgemeine Zulassungsvoraussetzungen:</b></p> <p>„4.1.1.2 Die Prüfung soll ferner feststellen, ob ein Schulbuch dem Ziel einer gleichwertigen und partnerschaftlichen Lebensgestaltung von Mädchen und Jungen entspricht und ob es zeitgemäße und ausreichende Identifikationsangebote für Mädchen und Jungen im beruflichen und privaten Bereich enthält.“ (1986, 437)</p> <p>Genehmigung, Einführung und Verwendung von Lehr- und Lernmitteln, Verwaltungsvorschrift des Kultusministeriums von Rheinland-Pfalz von 1986.</p>                           |
| Saarland        | <p><b>Unterrichts- und Erziehungsauftrag:</b></p> <p>„(2) Alle Schülerinnen und Schüler sollen entsprechend ihren Fähigkeiten sowie unabhängig von ihrer ethnischen,</p>                                                                                                                                                                                                                                                                                                                                                                                                                                             |                                                                                                                                                                                                                                                                                                                                                                                                                                                                                                                                                                 |



| Bundesland     | Regelung                                                                                                                                                                                                                                                                                                                                                                                                                                                                                                                                                                                                                                                                            | Rekonstruierte Vorstufen (ohne Schulgesetze)                                                                                                                                                                                                                                                                                                                                                                                  |
|----------------|-------------------------------------------------------------------------------------------------------------------------------------------------------------------------------------------------------------------------------------------------------------------------------------------------------------------------------------------------------------------------------------------------------------------------------------------------------------------------------------------------------------------------------------------------------------------------------------------------------------------------------------------------------------------------------------|-------------------------------------------------------------------------------------------------------------------------------------------------------------------------------------------------------------------------------------------------------------------------------------------------------------------------------------------------------------------------------------------------------------------------------|
|                | <p>kulturellen oder sozialen Herkunft grundsätzlich gleichberechtigt, ungehindert und barrierefrei an den Angeboten des Bildungssystems teilhaben können. Dabei hat die Schule durch Erziehung und Unterricht die Schülerinnen und Schüler [...] zur Erfüllung ihrer Pflichten in Familie, Beruf und der sie umgebenden Gemeinschaft, [...] zur Übernahme der sozialen und politischen Aufgaben von Bürgerinnen und Bürgern im freiheitlich-demokratischen und sozialen Rechtsstaat und zur Mitwirkung an der Gestaltung der Gesellschaft im Sinne der freiheitlich-demokratischen Grundordnung zu befähigen“ (2014, §1, Abs. 2)</p> <p>SchoG Saarland in der Fassung von 2014.</p> |                                                                                                                                                                                                                                                                                                                                                                                                                               |
| Sachsen        | <p><b>Allgemeine Zulassungsvoraussetzungen:</b></p> <p>„Zulassungsvoraussetzungen sind [...] 4. Angebote positiver Identifikationsmöglichkeiten sowohl für Mädchen als auch für Jungen“ (2013, §4, Abs. 1)</p> <p>Lernmittelverordnung Sachsen von 2013.</p>                                                                                                                                                                                                                                                                                                                                                                                                                        | <p>1993 bereits identisch:</p> <p><b>Allgemeine Zulassungsvoraussetzungen:</b></p> <p>„Zulassungsvoraussetzungen sind [...] 4. Angebote positiver Identifikationsmöglichkeiten sowohl für Mädchen als auch für Jungen“ (1993, §4, Abs. 1)</p> <p>Lernmittelverordnung Sachsen von 1993.</p>                                                                                                                                   |
| Sachsen-Anhalt | <p><b>Allgemeine Zulassungsvoraussetzungen:</b></p> <p>„1.2 Wird das Schulbuch dem Artikel 3 des Grundgesetzes ‚Gleichheit vor dem Gesetz‘ gerecht und inwieweit entspricht die Darstellung von Frauen und Männern bzw. Mädchen und Jungen im Schulbuch dem Verfassungsgebot der Gleichberechtigung? Werden im Schulbuch Rollenklischees und stereotype Darstellungen vermieden (siehe Teil 3 der</p>                                                                                                                                                                                                                                                                               | <p>„6. Schulbücher sind zum Gebrauch an Schulen verwendbar, wenn sie [...] b) im Sinne des Artikels 3 des Grundgesetzes für die Bundesrepublik Deutschland in Text und Bild insbesondere der Gleichachtung und Gleichstellung der Geschlechter gerecht werden und frei sind von Stereotypen, Vorurteilen und Diskriminierungen, auch in Bezug auf einzelne Bevölkerungsgruppen sowie andere Länder, Kulturen und Religio-</p> |

| Bundesland | Regelung                                                                                                                                                                                                                                                                                                                                                                                                                                                                                               | Rekonstruierte Vorstufen (ohne Schulgesetze)                             |
|------------|--------------------------------------------------------------------------------------------------------------------------------------------------------------------------------------------------------------------------------------------------------------------------------------------------------------------------------------------------------------------------------------------------------------------------------------------------------------------------------------------------------|--------------------------------------------------------------------------|
|            | Studie ‚Gleichberechtigung von Mädchen und Jungen, Frauen und Männern in Schulbüchern‘, Kurzfassung Seite 33]?“ (2015], 2)                                                                                                                                                                                                                                                                                                                                                                             | nen“ (1999, 369)<br>Schulbücherzulassungserlass Sachsen-Anhalt von 1999. |
|            | Gutachterbogen – Hinweise zur Einschätzung von Schulbüchern, Landesinstitut für Schulqualität und Lehrerbildung Sachsen-Anhalt (2015].                                                                                                                                                                                                                                                                                                                                                                 |                                                                          |
|            | <b>Weitere Zulassungsvoraussetzungen:</b><br>„ <i>Spezifische Hinweise für Geschichte</i><br>[...] Werden bei der Schulbuchdarstellung die Dimensionen der Wahrnehmung von Geschichte (Politik-, Wirtschafts-, Kultur-, Alltags-, Umwelt- und Geschlechtergeschichte) angemessen berücksichtigt? [...] Sind wesentliche Positionen der beteiligten bzw. betroffenen Personen und Parteien bei der Darstellung eines historischen Ereignisses erkennbar, u. a. die geschichtliche Rolle der Frau? [...] |                                                                          |
|            | <b><i>Spezifische Hinweise für Mathematik</i></b><br>[...] Inwieweit enthält das Schulbuch praktische Problemstellungen aus dem Erfahrungsbereich der Schülerinnen und Schüler? Ergeben sich durch diese Praxisbezüge Identifikationsmöglichkeiten für Mädchen und Jungen? [...]                                                                                                                                                                                                                       |                                                                          |
|            | <b><i>Spezifische Hinweise für Deutsch</i></b><br>[...] Inwieweit enthalten diese Texte [= Lesebuchtexte; Anm. CO] positive Identifikationsmöglichkeiten für Mädchen und Jungen?“ (2015], 3; 71)                                                                                                                                                                                                                                                                                                       |                                                                          |
|            | Hinweise zum Gutachterbogen – Hinweise zur Einschätzung von Schulbüchern, Landesinstitut für Schulqualität und Lehrerbildung Sachsen-Anhalt (2015].                                                                                                                                                                                                                                                                                                                                                    |                                                                          |

| Bundesland         | Regelung                                                                                                                                                                                                                                                                                                                                                                                           | Rekonstruierte Vorstufen (ohne Schulgesetze)                                                                                                                                                                                                                                                                                                                                                                                                      |
|--------------------|----------------------------------------------------------------------------------------------------------------------------------------------------------------------------------------------------------------------------------------------------------------------------------------------------------------------------------------------------------------------------------------------------|---------------------------------------------------------------------------------------------------------------------------------------------------------------------------------------------------------------------------------------------------------------------------------------------------------------------------------------------------------------------------------------------------------------------------------------------------|
| Schleswig-Holstein | <p><b>Pädagogische Ziele:</b></p> <p>„Die Bildungswege sind so zu gestalten, dass jungen Menschen [...] unabhängig von ihrer Geschlechtszugehörigkeit der Zugang zu allen Schularten eröffnet und ein Schulabschluss ermöglicht wird, der ihrer Begabung, ihren Fähigkeiten und ihrer Neigung entspricht“ (2014, §4, Abs. 7)</p> <p>SchulG Schleswig-Holstein in der Fassung von 2014.</p>         | <p>Leitfragen zur Begutachtung von Schulbüchern von 1990 (nach Thiel 1994, 125).</p> <p>[Kriterienkatalog nicht zugänglich]</p>                                                                                                                                                                                                                                                                                                                   |
| Thüringen          | <p><b>Zulassungsvoraussetzungen:</b></p> <p>„§3 Anforderungen an Lehr- und Lernmittel</p> <p>[...] (2) Lehr- und Lernmittel sollen das Ziel einer gleichwertigen und partnerschaftlichen Lebensgestaltung von Mann und Frau berücksichtigen sowie zeitgemäße und ausreichende Identifikationsangebote enthalten.“ (2009, §3, Abs. 2)</p> <p>Thüringer Lehr- und Lernmittelverordnung von 2009.</p> | <p><b>Zulassungsvoraussetzungen:</b></p> <p>„§4 Inhaltliche Anforderungen</p> <p>[...] (2) Lehr- und Lernmittel sollen das Ziel einer gleichwertigen und partnerschaftlichen Lebensgestaltung von Mädchen und Jungen berücksichtigen und zeitgemäße und ausreichende Identifikationsangebote für Mädchen und Jungen im beruflichen und privaten Bereich bieten.“ (1991, §4, Abs. 2)</p> <p>Thüringer Lehr- und Lernmittelverordnung von 1991.</p> |

**ANHANG 5–2: InterviewpartnerInnen**

| <b>Int.-<br/>Ziffer</b> | <b>AkteurInnengruppe</b> | <b>Datum des Interviews</b> | <b>Art des Interviews</b>                            |
|-------------------------|--------------------------|-----------------------------|------------------------------------------------------|
| I                       | Redaktion                | 08.10.2013<br>15.01.2014    | Telefonat (Leitfragen)<br>face-to-face (ausführlich) |
| II                      | Behörde                  | 07.10.2013                  | Telefonat                                            |
| III                     | Behörde                  | 18.10.2013                  | E-Mail                                               |
| IV                      | Behörde                  | 21.10.2013                  | E-Mail                                               |
| V                       | AutorInnenteam           | 07.12.2013                  | Telefonat                                            |
| VI                      | AutorInnenteam           | 07.01.2014                  | Telefonat                                            |
| VII                     | AutorInnenteam           | 07.01.2014                  | Telefonat +<br>ergänzende Antworten per E-Mail       |
| VIII                    | GutachterIn              | 07.01.2014                  | Telefonat                                            |
| IX                      | AutorInnenteam           | 09.01.2014                  | Telefonat                                            |
| X                       | AutorInnenteam           | 13.01.2014                  | face-to-face                                         |
| XI                      | Redaktion                | 13.01.2014                  | E-Mail                                               |
| XII                     | AutorInnenteam           | 14.01.2014                  | face-to-face                                         |
| XIII                    | GutachterIn              | 15.01.2014                  | face-to-face                                         |
| XIV                     | AutorInnenteam           | 16.01.2014<br>28.01.2014    | face-to-face +<br>ergänzende Antworten per E-Mail    |
| XV                      | Redaktion                | 16.01.2014                  | Telefonat                                            |
| XVI                     | Behörde                  | 17.01.2014                  | Telefonat                                            |
| XVII                    | Behörde                  | 17.01.2014<br>06.03.2015    | Telefonat +<br>ergänzende Antworten per E-Mail       |
| XVIII                   | Redaktion                | 20.01.2014                  | Telefonat                                            |
| XIX                     | AutorInnenteam           | 04.02.2014                  | Telefonat                                            |
| XX                      | GutachterIn              | 05.03.2014                  | Telefonat                                            |
| XXI                     | Behörde                  | 06.03.2014                  | Telefonat                                            |
| XXII                    | AutorInnenteam           | 14.04.2014                  | Telefonat                                            |
| XXIII                   | AutorInnenteam           | 14.04.2014                  | face-to-face                                         |
| XXIV                    | Redaktion                | 15.04.2014                  | Telefonat                                            |
| XXV                     | Behörde                  | 06.03.2015                  | Telefonat                                            |
| XXVI                    | Behörde                  | 06.03.2015                  | Telefonat +<br>ergänzende Antworten per E-Mail       |

## ANHANG 5–3: Fragebögen der leitfadengestützten Interviews

[Leitfragen sind durch Fettdruck hervorgehoben]

---

Zum Umgang mit Geschlecht in der Schulbucharbeit I

### Fragen an SchulbuchautorInnen und SchulbuchherausgeberInnen

---

I. Zur Person und zum ExpertInnen-Status:

- I.1 **Seit und ggfs. bis wann haben Sie an Schulbüchern mitgearbeitet?**
  - I.2 An welchem Buch/welchen Büchern waren Sie konkret beteiligt?  
(Titel, Fach, Bundesland, Schulart, Jahrgangsstufe, Verlag, Ersterscheinungsjahr)
  - I.3 **Seit wann spielen Ihres Wissens Fragen der Geschlechterdarstellung beim Konzipieren und Verfassen von Schulbüchern eine Rolle?**
- 

II. Vorgaben:

- II.1 **Welche behördlichen Vorgaben zu Lernmitteln hatten/haben Sie beim Abfassen der Schulbücher zu berücksichtigen?**
    - a) Bezeichnung(en) der Vorgabe(n): \_\_\_\_\_
    - b) **Welche Regelungen werden darin hinsichtlich der Darstellung der Geschlechter getroffen?**
  - II.2 **Welche Vorgaben des Verlags hatten/haben Sie beim Abfassen der Schulbücher zu berücksichtigen?**
    - a) Bezeichnung(en) der Vorgabe(n): \_\_\_\_\_
    - b) **Welche Regelungen werden darin hinsichtlich der Darstellung der Geschlechter getroffen?**
  - II.3 *Falls noch nicht unter II.1b+2b mitbeantwortet:*  
**Welche konkreten Vorgaben zur Bezeichnung von Personen und zu weiteren sprachlichen Feinheiten hinsichtlich der Darstellung der Geschlechter wurden/werden gemacht?** (Ggfs. sortieren nach: Verbot, Forderungen, Sonstiges)
  - II.4 *Wenn Sie SchulbuchautorIn für verschiedene Fächer oder Verlage sind/waren:*  
**Welche Unterschiede waren/sind je nach Fach und Verlag festzustellen, ob und in welchem Maß Geschlechterfragen bei der Schulbucherstellung berücksichtigt wurden/werden?**
  - II.5 Verfügen Sie noch über Kopien der behördlichen oder verlegerischen Vorgabe(n)?
- 

III. Kommunikation:

- III.1 Mit welcher Abteilung/Fachreferat der Zulassungsbehörde hatten/haben Sie im Zusammenhang mit Ihrer Arbeit am Schulbuch ggfs. Kontakt? Aus welchem Grund?
  - III.2 **Hatten Sie Einsicht in die Gutachten zu den Schulbüchern oder erfuhren Sie über die Verlagsredaktion von den Inhalten der Gutachten?**
  - III.3 **Welche Anmerkungen zur Geschlechterthematik fanden sich in den Gutachten, welche Änderungen wurden für eine Zulassung ggfs. verlangt?**
  - III.4 Wird ein Schulbuch Ihrer Erfahrung nach auf den ersten Antrag hin zugelassen?
-

- 
- III.5 *Falls Sie einverstanden sind, dass wir ggfs. beim Verlag weiterrecherchieren:*  
Wer war/ist Ihre Ansprechperson im Verlag (Name, Funktion, Abteilung, ggfs. Kontakt)?
- III.6 Wie kam es dazu, dass Sie SchulbuchautorIn wurden? [in der Erhebungspraxis häufig an Anfang gestellt]
- 

Vielen Dank für Ihre Unterstützung!

---



---

## Zum Umgang mit Geschlecht in der Schulbucharbeit II

### Fragen an SchulbuchredakteurInnen

---

#### I. Zur Person

#### II. Behördliche Vorgaben:

- II.1 **Seit wann sind Ihres Wissens Fragen der Geschlechterdarstellung ein Zulassungskriterium für Schulbücher?**
- II.2 **Welche behördlichen Vorgaben hat Ihre Redaktion aktuell in der Schulbucharbeit zu berücksichtigen?** (Wenn möglich, bitte in Bundesländer differenzieren.)
- II.3 Nutzt der Verlag/die Redaktion eine Zusammenstellung oder Synopse der verschiedenen Ländervorgaben in der Schulbucharbeit?
- II.4 **Welche Regelungen werden in den Vorgaben hinsichtlich der Darstellung der Geschlechter getroffen?** (Wenn möglich, bitte in Bundesländer differenzieren.)
- II.5 **Welche konkreten Vorgaben zur Bezeichnung von Personen und zu weiteren sprachlichen Feinheiten hinsichtlich der Darstellung der Geschlechter werden darin Ihres Wissens gemacht?**
- II.6 **Verfügt Ihr Verlag über Kopien älterer behördlicher Vorgaben/Begutachtungskriterien für die Lernmittelzulassung, die einsehbar gemacht werden könnten?**
- 

#### III. Verlagsinterne Regelungen:

- III.1 **Welche Regelungen zur Geschlechtersensibilität von Schulbüchern im Allgemeinen und zur Bezeichnung von Personen und zu weiteren sprachlichen Feinheiten hinsichtlich der Darstellung der Geschlechter im Besonderen sind verlagsintern und/oder in Ihrer Redaktion in Gebrauch?** (Wenn möglich, bitte sortieren in: Unbedingt zu Berücksichtigendes, Zu Unterlassendes, Sonstiges)
- III.2 Welche Unterschiede bestehen in Detailgrad und Inhalten zwischen verlags-/redaktionsinternen Richtlinien und behördlichen Vorgaben?
- III.3 **Können Kopien älterer verlags- oder redaktionsinterner Richtlinien für die Forschung einsehbar gemacht werden?**
- 

#### IV. Unterschiede nach Fach oder Schulart und Land:

- IV.1 Inwiefern werden Geschlechterfragen Ihrer Erfahrung nach in der *Schulbucheerstellung* sowie der *Schulbuchzulassung* je nach Fach oder Schulart unterschiedlich stark be-
-

rücksichtigt?

- IV.2 **Werden in bestimmten Bundesländern Geschlechterfragen im Verfahren der Schulbuchzulassung besonders stark oder besonders wenig berücksichtigt?**  
(Ggfs. bitte die Länder/Behörden nennen und kurz erläutern.)

---

V. Kommunikation mit den Behörden:

- V.1 Mit welchen Abteilungen/Fachreferaten der Zulassungsbehörde haben Sie im Zusammenhang mit der Schulbuchzulassung Kontakt?  
(Bitte die genaue Bezeichnung der Abteilungen angeben, falls bekannt.)
- V.2 a) **Wie häufig gehen Schulbuch-Gutachten auf die Geschlechterthematik i. A. ein?**  
(Antwort bitte nach dem Muster: In x von 10 Fällen)  
b) **Wie häufig gehen Schulbuch-Gutachten auf geschlechtersensible Sprache i. B. ein?** (In x von 10 Fällen)
- V.3 Welche Kritikpunkte und Pluspunkte werden in den Gutachten zum Bewertungsaspekt Gleichberechtigung der Geschlechter genannt?
- V.4 **Welche Änderungen werden ggfs. an einzelnen Formulierungen eingefordert?**

---

Vielen Dank für Ihre Unterstützung!

---



---

## Zum Umgang mit Geschlecht in der Lernmittelzulassung I Fragen an GutachterInnen von Bildungsmedien

---

I. Zur Person und zum ExpertInnen-Status:

- I.1 **Welche zulassungspflichtigen Lernmittel haben Sie begutachtet?**  
(Jahr des Gutachtens; Fach; Bundesland; Schulart; Jahrgangsstufe)
- I.2 Seit wann sind Ihres Wissens Fragen der Geschlechterdarstellung ein Zulassungskriterium für Schulbücher? (ggfs. Antwort auf ein Bundesland beschränken)

---

II. Beurteilungskriterien für Lernmittel:

- II.1 **Inwiefern gingen Sie in Ihren Gutachten auf Fragen der Geschlechterdarstellung ein?**
- II.2 **Welche spezifischen Lernmittelvorgaben der Zulassungsbehörde hatten Sie bei der Begutachtung zu berücksichtigen?**
- II.3 **Welche konkreten Vorgaben zur Bezeichnung von Personen und zu weiteren sprachlichen Feinheiten hinsichtlich der Darstellung der Geschlechter wurden darin ggfs. formuliert?** (Wenn möglich, bitte sortieren in: Verbote, Forderungen, Sonstiges)
- II.4 **Welche weiteren Vorgaben zur Geschlechterthematik wurden darin ggfs. formuliert?**
- II.5 Halten Sie die Vorgaben für angemessen, überzogen, nicht praktikabel?
- II.6 **Verfügen Sie über eine Kopie der behördlichen Vorgabe(n)?**
- II.7 Wenn Sie GutachterIn für verschiedene Fächer oder Bundesländer waren:  
Welche Unterschiede waren je nach Fach und Bundesland in Bezug auf Geschlechterfragen im Zulassungsverfahren festzustellen?
-

---

II.8 **Würden Sie uns Ihr(e) Gutachten zur Verfügung stellen?**

---

III. Gutachteninhalte und Kommunikation mit der Zulassungsbehörde:

- III.1 a) **Inwiefern gingen Sie in Ihren Gutachten ggfs. auf die Geschlechterthematik ein?**  
 b) **Was wurde im Einzelnen kritisiert, was lobend erwähnt?**  
 c) **Inwiefern betreffen diese Ausführungen die Ebene der Sprache?**
  - III.2 **Mit welchen Abteilungen/Fachreferaten der Zulassungsbehörde hatten Sie im Zusammenhang mit der Begutachtung Kontakt?** (Bitte die genaue Bezeichnung der Abteilungen angeben, falls bekannt.)
  - III.3 **Sofern es mit der zuständigen Behörde zu einem inhaltlichen Austausch (Rückfragen, Ergänzungswünsche, ggfs. Kritik) über Ihr Gutachten gekommen ist: Inwiefern spielte die Geschlechterthematik dabei eine Rolle?**
  - III.4 **Haben Sie schon einmal für ein Lernmittel wegen mangelnder Geschlechtersensibilität oder Ähnlichem die Zulassung nicht empfohlen?**
  - III.5 Welche Personen welcher Abteilung entscheiden Ihres Wissens letztlich über die Zulassung?
  - III.6 **Wie kamen Sie zu der Tätigkeit als Lernmittel-GutachterIn?**
  - III.7 Wie wurden Sie auf Ihre GutachterInnenstätigkeit durch die Zulassungsbehörde vorbereitet?
- 

Vielen Dank für Ihre Unterstützung!

---



---

Zum Umgang mit Geschlecht in der Lernmittelzulassung II

**Fragen an BehördenmitarbeiterInnen**

---

I. Zur Person und zum ExpertInnen-Status:

- I.1 Seit wann sind Sie an der Zulassung von Lernmitteln beteiligt?
  - I.2 **Seit wann spielen Ihres Wissens Fragen der Geschlechterdarstellung bei der Zulassung von Lernmitteln eine Rolle?**
- 

II. Beurteilungskriterien von Lernmitteln:

- II.1 Welche Behördenvorgaben werden von der Zulassungsstelle bei der Zulassung berücksichtigt?
  - II.2 **Existieren spezielle Hinweise für GutachterInnen, worauf bei der Begutachtung im Einzelnen geachtet werden soll, oder Kriterienkataloge als Orientierung für Schulbuchverlage?**
  - II.3 Wer war an der Erstellung der GutachterInnenhinweise/Kriterienkataloge beteiligt?
  - II.4 **Würden Sie uns ein Exemplar der GutachterInnenhinweise/Kriterienkataloge zukommen lassen?**
  - II.5 **Verfügen Sie über Kopien älterer GutachterInnenhinweise/Kriterienkataloge?**
  - II.6 **Inwiefern wird darin zu Geschlechterfragen Stellung genommen?**
-



---

### III. GutachterInnen:

- III.1 **Wer begutachtet Lernmittel?** (ggfs. unterscheiden in behördenintern/-extern)
  - III.2 **Nach welchen Kriterien werden externe GutachterInnen ausgewählt?**
  - III.3 Werden GutachterInnen geschult?
  - III.4 Kann die Behörde einen Kontakt zu GutachterInnen herstellen?
- 

### IV. Dokumentation Zulassungsverfahren:

- IV.1 Was geschieht mit Prüfexemplaren nach der Begutachtung?
    - a) Wo werden begutachtete Prüfstücke ggfs. archiviert?
    - b) Werden auch abgelehnte Prüfstücke ggfs. archiviert?
  - IV.2 Kann Zugang zu archivierten begutachteten Lernmitteln für Forschungszwecke gewährt werden?
  - IV.3 **Kann Zugang zu Gutachten und zum Schriftverkehr zwischen Behörde, Verlag und GutachterInnen gewährt werden?**
- 

### V. Vom Gutachten zur Zulassung:

- V.1 Welche Abteilungen/Fachreferate sind an der Lernmittelzulassung beteiligt?
  - V.2 Wird ein Schulbuch Ihrer Erfahrung nach auf den ersten Antrag hin zugelassen?
  - V.3 **Wurde Ihrer Kenntnis nach einem Lernmittel schon einmal aufgrund seines Umgangs mit der Geschlechterthematik die Zulassung verweigert?**
  - V.4
    - a) **Wie häufig gehen Schulbuch-Gutachten auf die Geschlechterthematik i. A. ein?**  
(Antwort bitte nach dem Muster: In x von 10 Fällen)
    - b) **Wie häufig gehen Schulbuch-Gutachten auf geschlechtersensible Sprache i. B. ein?** (In x von 10 Fällen)
  - V.5 **Sofern es mit einer/einem GutachterIn zu einem inhaltlichen Austausch (Rückfragen, Ergänzungswünsche, ggfs. Kritik) über ein Gutachten gekommen ist: Inwiefern spielte die Geschlechterthematik dabei eine Rolle?**
  - V.6 Wird die Geschlechterthematik Ihrer Erfahrung nach in der Schulbuchbegutachtung je nach Fach (z. B. Deutsch vs. Mathematik) oder Schulart unterschiedlich stark berücksichtigt/thematisiert? Wenn ja: Inwiefern?
- 

Vielen Dank für Ihre Unterstützung!

---

**ANHANG 5–4: Dokumente aus dem Zulassungsverfahren**

| <b>Dok.-<br/>Ziffer</b> | <b>Dokumententyp</b>                                                                 | <b>Jahr</b> | <b>Bundesland</b> | <b>Fach</b> | <b>Jgst.</b> |
|-------------------------|--------------------------------------------------------------------------------------|-------------|-------------------|-------------|--------------|
| I                       | Gutachten                                                                            | 1984        | Niedersachsen     | Deutsch     | 7            |
| II                      | Gutachten mit behördlichem Informationsschreiben zum veränderten Zulassungsverfahren | 1986        | Niedersachsen     | Deutsch     | 8            |
| III                     | Gutachten mit behördlichem Begleitschreiben                                          | 1986        | NRW               | Deutsch     | 9            |
| IV                      | Gutachten mit behördlichem Bescheid                                                  | 1988        | Niedersachsen     | Chemie      | Oberstufe    |
| V                       | Gutachten                                                                            | 1988        | Niedersachsen     | Geschichte  | Oberstufe    |
| VI                      | Behördliches Informationsschreiben zum veränderten Zulassungsverfahren               | 1988        | NRW               | Geschichte  | alle         |
| VII                     | Gutachten (A + B) mit behördlichem Bescheid                                          | 1988        | NRW               | Geschichte  | Oberstufe    |
| VIII                    | Gutachten                                                                            | 1988        | NRW               | Deutsch     | 6            |
| IX                      | Gutachten mit behördlichem Bescheid                                                  | 1992        | Niedersachsen     | Geschichte  | Oberstufe    |
| X                       | Gutachten                                                                            | 1993        | Bayern            | Deutsch     | 7            |
| XI                      | Gutachten mit behördlichem Bescheid                                                  | 1994        | Berlin            | Geschichte  | Oberstufe    |
| XII                     | Gutachten                                                                            | 1994        | Berlin            | Geschichte  | Oberstufe    |
| XIII                    | Gutachten                                                                            | 1994        | Berlin            | Geschichte  | Oberstufe    |
| XIV                     | Gutachten                                                                            | 1994        | Brandenburg       | Deutsch     | 8            |
| XV                      | Gutachten (A + B)                                                                    | 1994        | Brandenburg       | Deutsch     | 10           |
| XVI                     | Gutachten                                                                            | 1994        | Bremen            | Deutsch     | 10           |
| XVII                    | Gutachten mit behördlichem Bescheid                                                  | 1994        | Hessen            | Geschichte  | Oberstufe    |
| XVIII                   | Gutachten                                                                            | 1994        | Niedersachsen     | Deutsch     | 8            |
| XIX                     | Gutachten mit behördlichem Bescheid                                                  | 1994        | NRW               | Geschichte  | Oberstufe    |
| XX                      | Gutachten mit behördlichem Bescheid                                                  | 1995        | Hessen            | Latein      | o. A.        |
| XXI                     | Redaktionelle Stellungnahme                                                          | 1995        | Hessen            | Latein      | o. A.        |
| XXII                    | Gutachten                                                                            | 1995        | NRW               | Deutsch     | 5/6          |
| XXIII                   | Gutachten                                                                            | 1995        | NRW               | Deutsch     | 10           |

| <b>Dok.-<br/>Ziffer</b> | <b>Dokumententyp</b>                                | <b>Jahr</b> | <b>Bundesland</b> | <b>Fach</b> | <b>Jgst.</b> |
|-------------------------|-----------------------------------------------------|-------------|-------------------|-------------|--------------|
| XXIV                    | Gutachten mit behördlichem Bescheid                 | 1995        | NRW               | Italienisch | 9            |
| XXV                     | Gutachten mit behördlichem Bescheid                 | 1996        | Berlin            | Deutsch     | 7            |
| XXVI                    | Gutachten mit behördlichem Bescheid                 | 1997        | Hessen            | Deutsch     | 6            |
| XXVII                   | Gutachten (A + B) mit behördlichem Bescheid         | 1998        | Bayern            | Mathematik  | 6            |
| XXVIII                  | Gutachten (A + B) mit behördlichem Bescheid         | 1999        | Hessen            | Deutsch     | 10           |
| XXIX                    | Behördliche Stellungnahme                           | 1999        | Hessen            | Deutsch     | 9/10         |
| XXX                     | Gutachten (A + B)                                   | 2000        | Bayern            | Deutsch     | 8            |
| XXXI                    | Gutachten mit behördlichem Bescheid                 | 2000        | Hessen            | Deutsch     | 7            |
| XXXII                   | Redaktionelle Stellungnahme                         | 2000        | Hessen            | Deutsch     | 7            |
| XXXIII                  | Behördliche Antwort auf redaktionelle Stellungnahme | 2000        | Hessen            | Deutsch     | 7            |
| XXXIV                   | Gutachten mit behördlichem Bescheid                 | 2005        | Niedersachsen     | Deutsch     | 7            |
| XXXV                    | Gutachten mit behördlichem Bescheid                 | 2006        | Niedersachsen     | Deutsch     | 8            |
| XXXVI                   | Gutachten                                           | 2007        | Bayern            | Deutsch     | 8            |
| XXXVII                  | Gutachten                                           | 2007        | Niedersachsen     | Deutsch     | 8            |
| XXXVIII                 | Gutachten (A + B) mit behördlichem Bescheid         | 2012        | Bayern            | Deutsch     | 6            |
| XXXIX                   | Gutachten (A + B) mit behördlichem Bescheid         | 2013        | Bayern            | Deutsch     | 7            |
| XL                      | Redaktionelle Stellungnahme                         | 2014        | Bayern            | Deutsch     | 8            |
